# Supplementary material for: The α-hydroxyphosphonate-phosphate rearrangement of a noncyclic substrate – some new observations
Source: Royal Society of Chemistry journal article supplement (doi:10.1039/c8ob00419f), 2018-01-01

## Electronic Supplementary Information (ESI)

### The $\alpha$ -hydroxyphosphonate-phosphate rearrangement of a noncyclic substrate – Some new observations

Susanne Prechelmacher,<sup>a</sup> Kurt Mereiter<sup>b</sup> and Friedrich Hammerschmidt<sup>\*a</sup>

<sup>a</sup>Faculty of Chemistry, Institute of Organic Chemistry, University of Vienna,  
Währingerstrasse 38, A-1090 Vienna, Austria

<sup>b</sup>Institute of Chemical Technologies and Analytics, Vienna University of Technology,  
Getreidemarkt 9/164, A-1060 Vienna, Austria .

E-mail: [friedrich.hammerschmidt@univie.ac.at](mailto:friedrich.hammerschmidt@univie.ac.at)

#### Table of Contents

|                                                                                                                                |        |
|--------------------------------------------------------------------------------------------------------------------------------|--------|
| <sup>1</sup> H NMR spectrum of compounds ( $\pm$ )- and ( <i>R</i> )-(-)- <b>10</b>                                            | ESI-3  |
| <sup>13</sup> C NMR spectrum ( <i>J</i> -modulated) of compounds ( $\pm$ )- and ( <i>R</i> )-(-)- <b>10</b>                    | ESI-4  |
| <sup>31</sup> P NMR spectrum of compounds ( $\pm$ )- and ( <i>R</i> )-(-)- <b>10</b>                                           | ESI-5  |
| <sup>1</sup> H NMR spectrum of compound ( <i>R</i> )- <b>11</b> × (-)- <b>10</b> × 0.5H <sub>2</sub> O                         | ESI-6  |
| <sup>13</sup> C NMR spectrum ( <i>J</i> -modulated) of compound ( <i>R</i> )- <b>11</b> × (-)- <b>10</b> × 0.5H <sub>2</sub> O | ESI-7  |
| <sup>31</sup> P NMR spectrum of compound ( <i>R</i> )- <b>11</b> × (-)- <b>10</b> × 0.5H <sub>2</sub> O                        | ESI-8  |
| <sup>1</sup> H NMR spectrum of compound <b>14</b>                                                                              | ESI-9  |
| <sup>13</sup> C NMR spectrum ( <i>J</i> -modulated) of compound <b>14</b>                                                      | ESI-10 |
| <sup>1</sup> H NMR spectrum of compound <b>15</b>                                                                              | ESI-11 |
| <sup>13</sup> C NMR spectrum ( <i>J</i> -modulated) of compound <b>15</b>                                                      | ESI-12 |
| <sup>1</sup> H NMR spectrum of compound <b>16</b>                                                                              | ESI-13 |
| <sup>13</sup> C NMR spectrum ( <i>J</i> -modulated) of compound <b>16</b>                                                      | ESI-14 |
| <sup>1</sup> H NMR spectrum of compound <b>17</b>                                                                              | ESI-15 |

## ESI-2

|                                                                           |           |
|---------------------------------------------------------------------------|-----------|
| <sup>13</sup> C NMR spectrum ( <i>J</i> -modulated) of compound <b>17</b> | ESI-16    |
| <sup>1</sup> H NMR spectrum of compound <b>18</b>                         | ESI-17    |
| <sup>13</sup> C NMR spectrum ( <i>J</i> -modulated) of compound <b>18</b> | ESI-18    |
| <sup>1</sup> H NMR spectrum of compound <b>20</b>                         | ESI-19    |
| <sup>13</sup> C NMR spectrum ( <i>J</i> -modulated) of compound <b>20</b> | ESI-20    |
| <sup>31</sup> P NMR spectrum of compound <b>20</b>                        | ESI-21    |
| <sup>1</sup> H NMR spectrum of compound <b>23</b>                         | ESI-22    |
| <sup>13</sup> C NMR spectrum ( <i>J</i> -modulated) of compound <b>23</b> | ESI-23    |
| <sup>31</sup> P NMR spectrum of compound <b>23</b>                        | ESI-24    |
| <sup>1</sup> H NMR spectrum of compound <b>22</b>                         | ESI-25    |
| <sup>13</sup> C NMR spectrum ( <i>J</i> -modulated) of compound <b>22</b> | ESI-26    |
| <sup>31</sup> P NMR spectrum of mixture of <b>22</b> and <b>25</b>        | ESI-27    |
| Single crystal X-ray structure analysis                                   | ESI-28-31 |

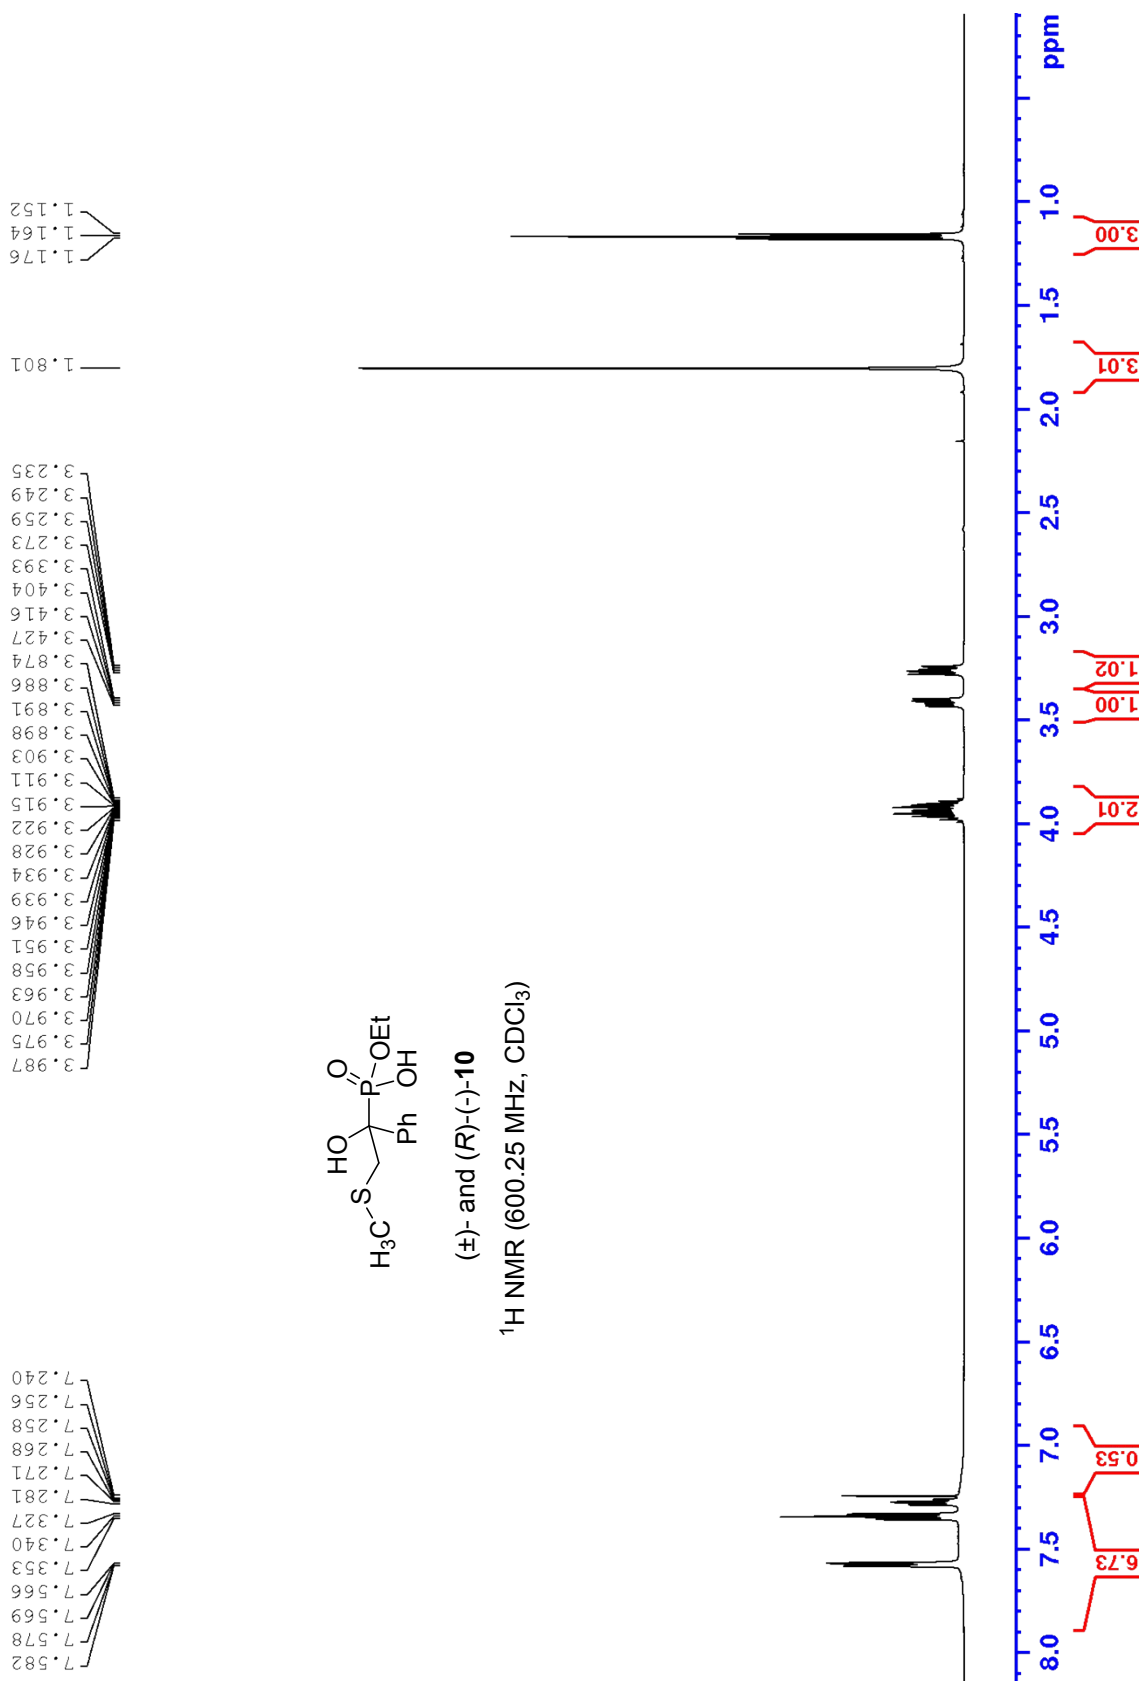

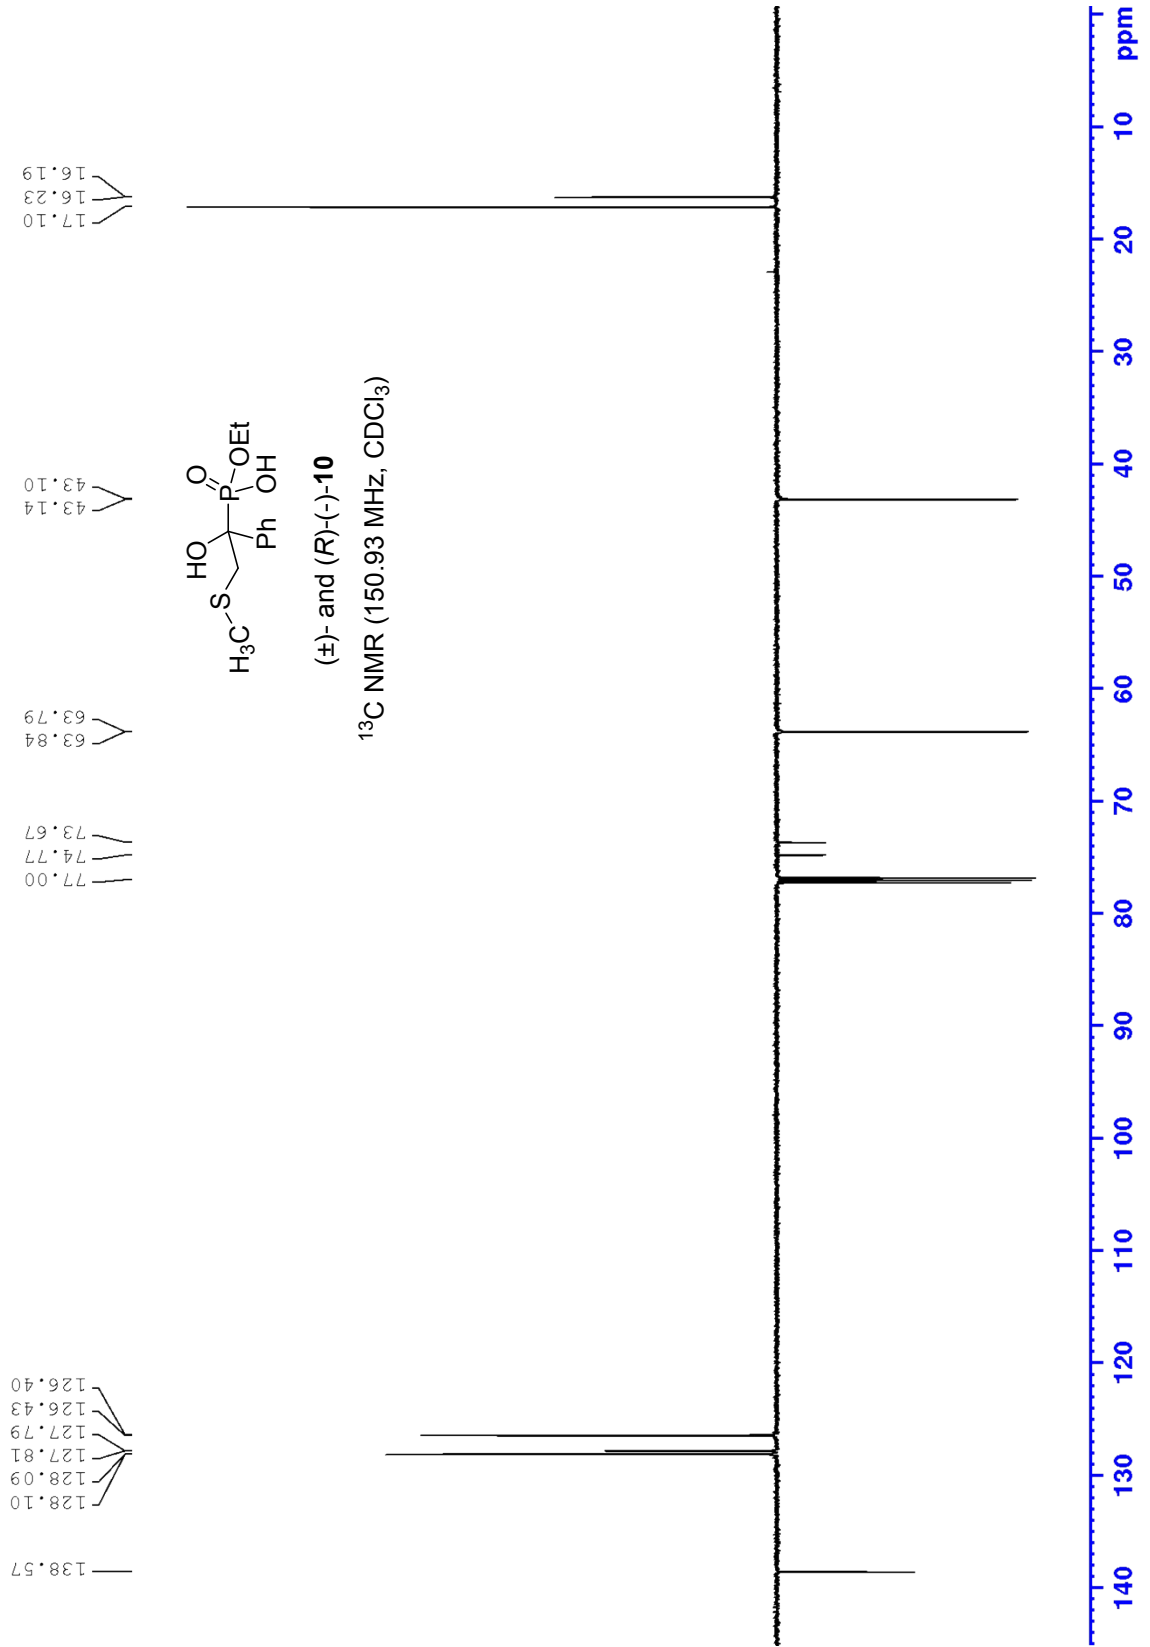

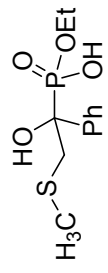

(±)- and (R)-(-)-**10**

<sup>31</sup>P NMR (242.98 MHz, CDCl<sub>3</sub>)

23.44

35 30 25 20 15 10 5 0 ppm

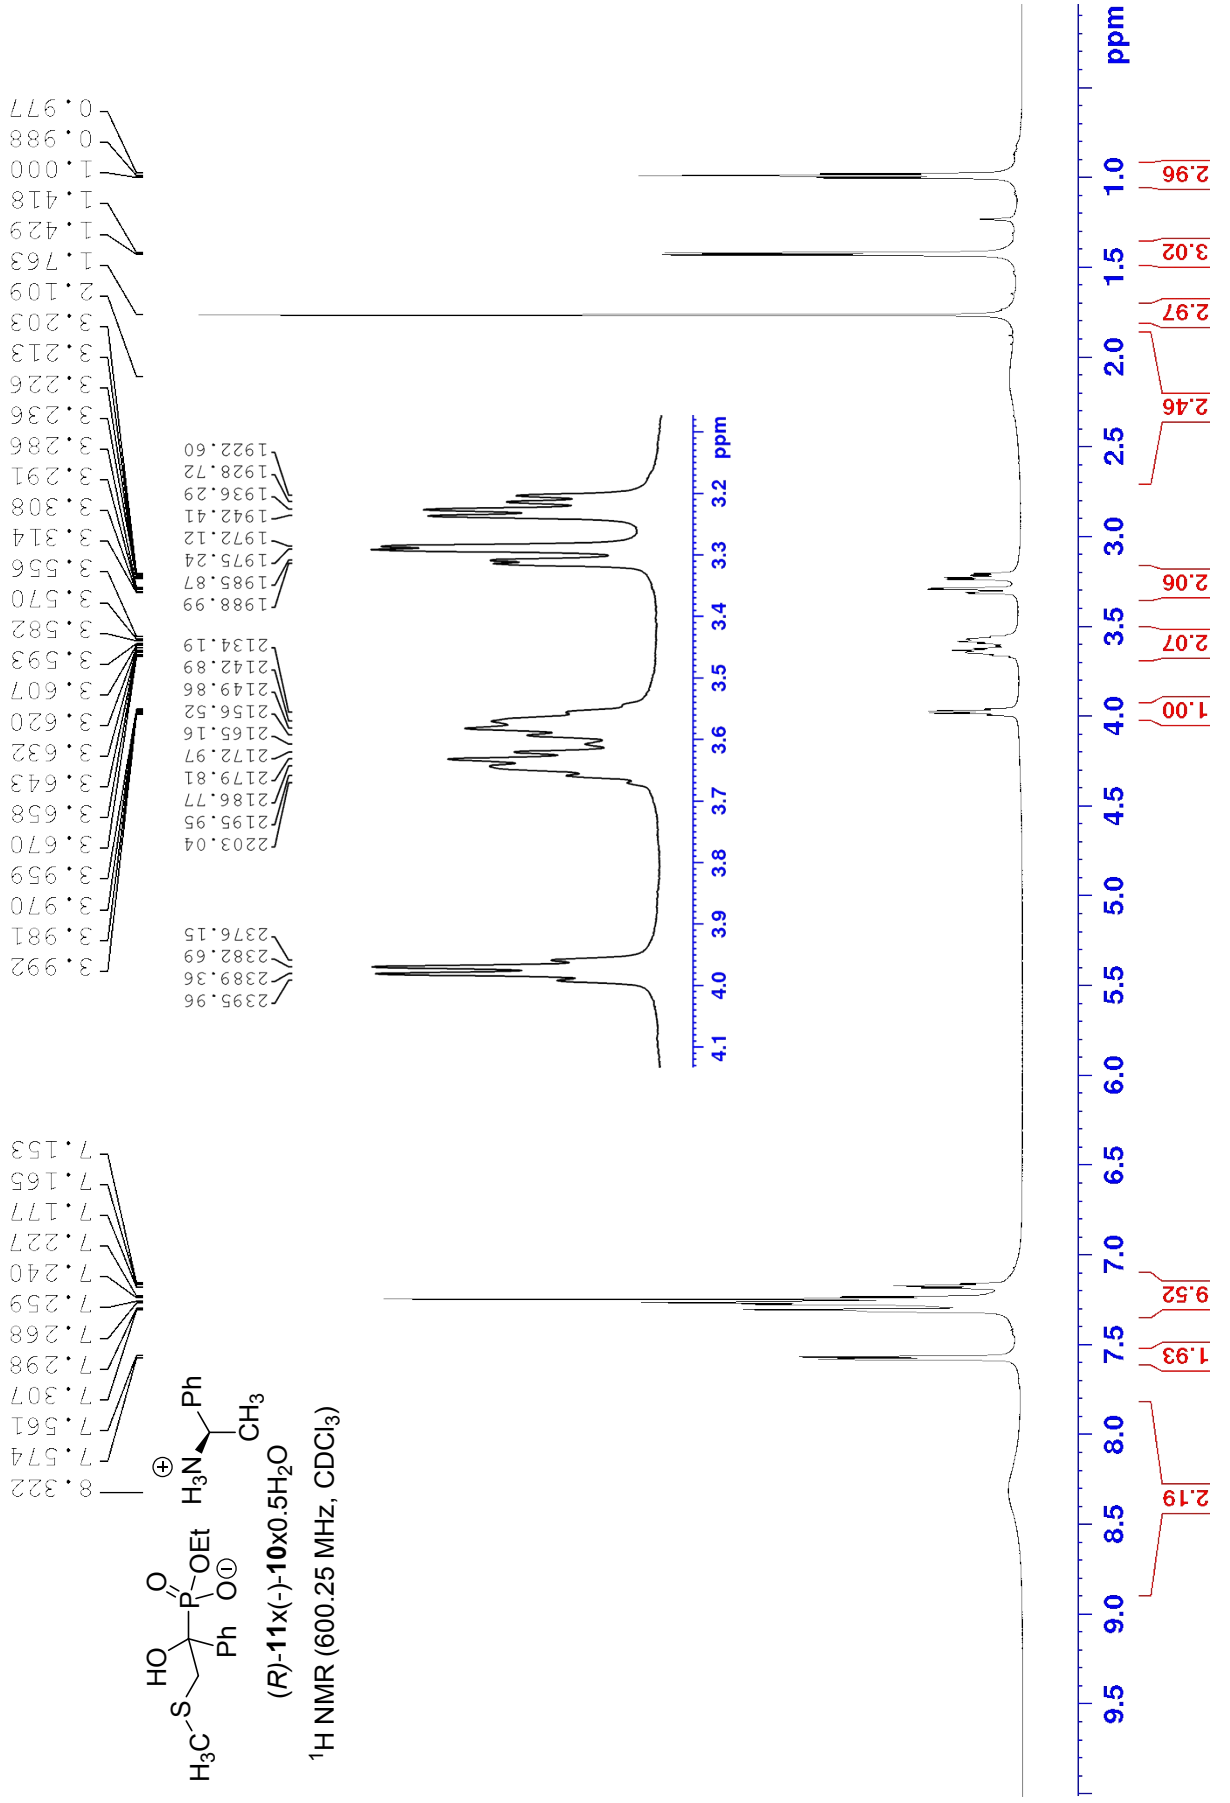

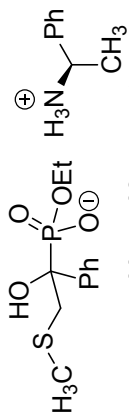

(R)-11x(-)-10x0.5H<sub>2</sub>O  
<sup>13</sup>C NMR (150.93 MHz, CDCl<sub>3</sub>)

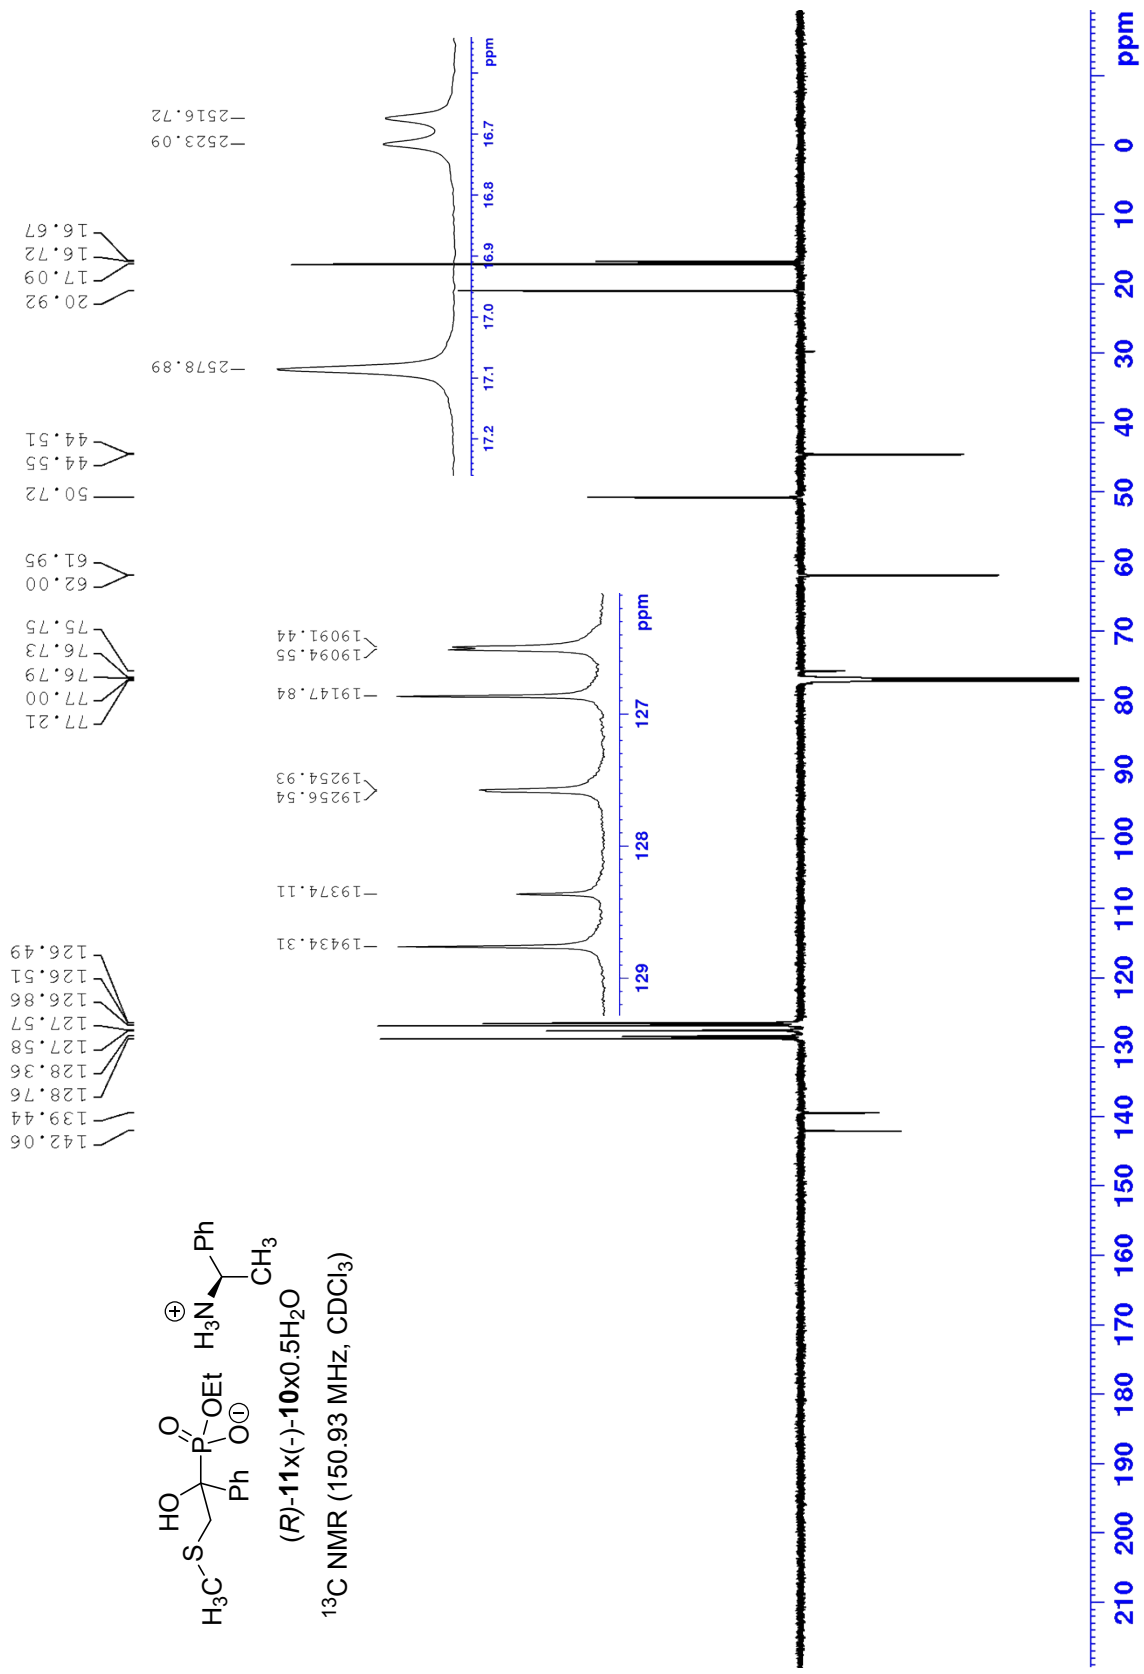

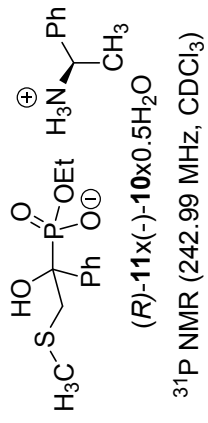

17.39

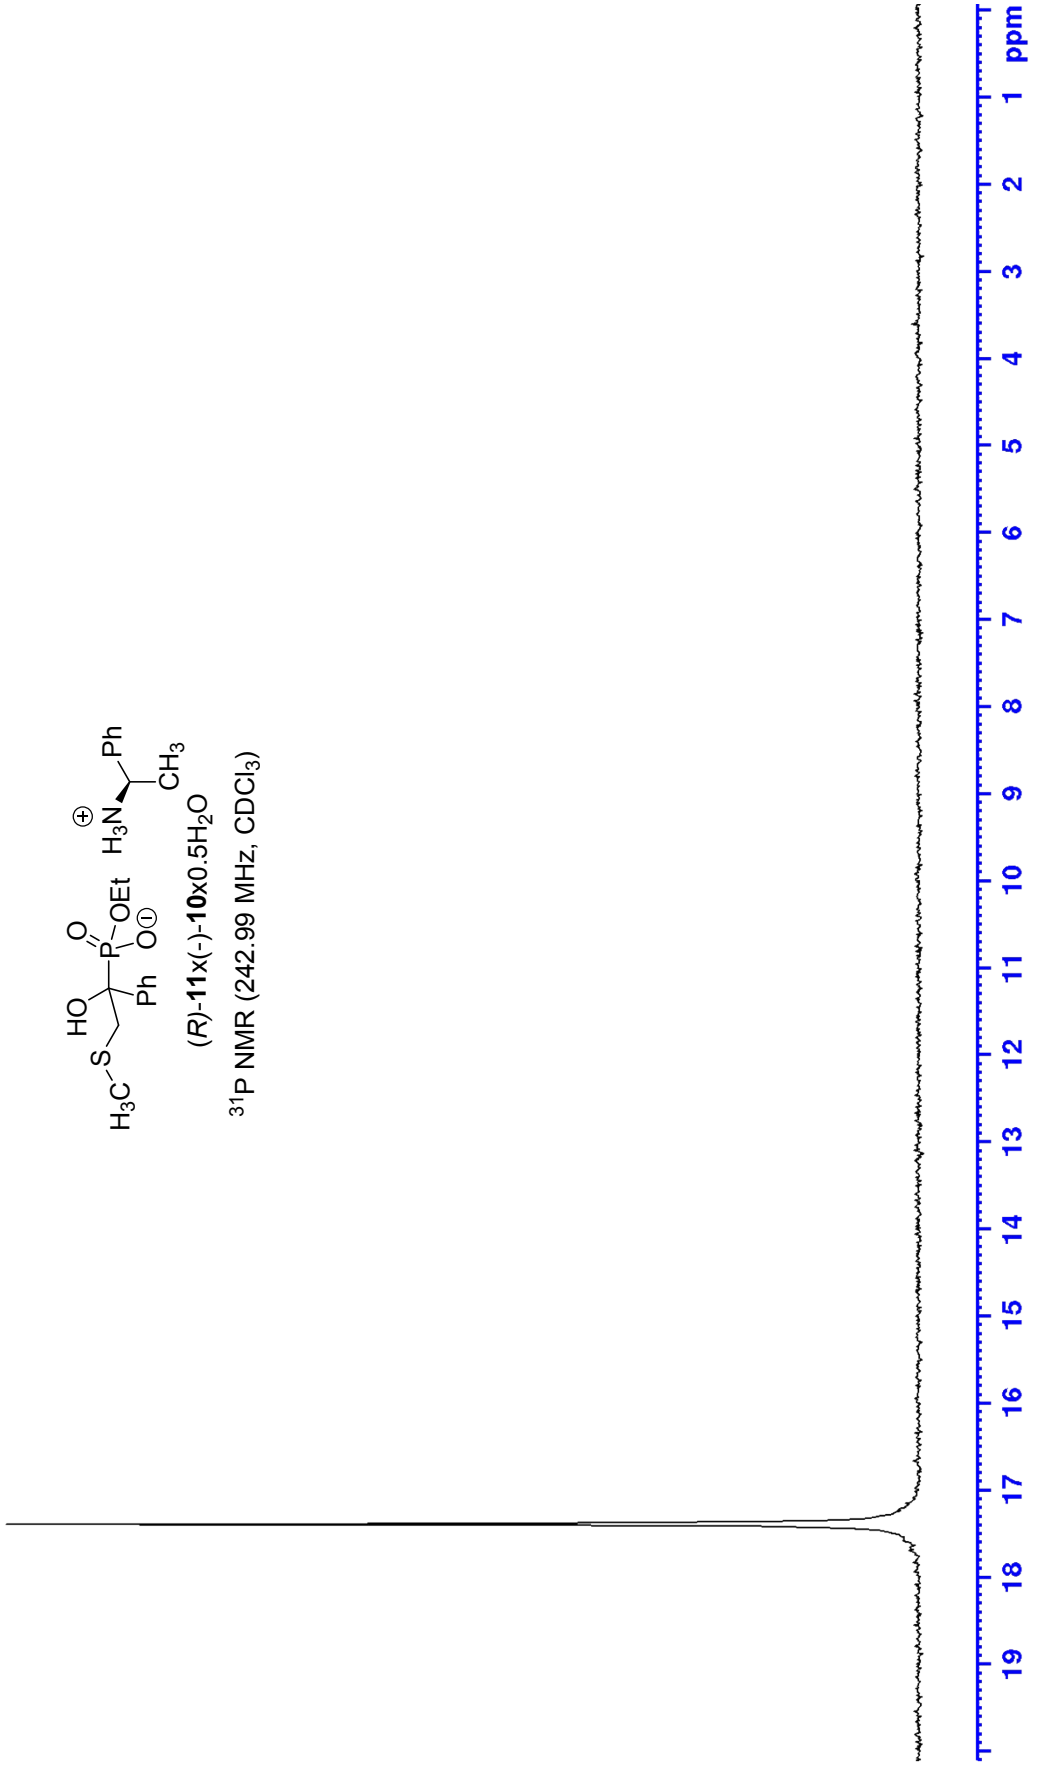



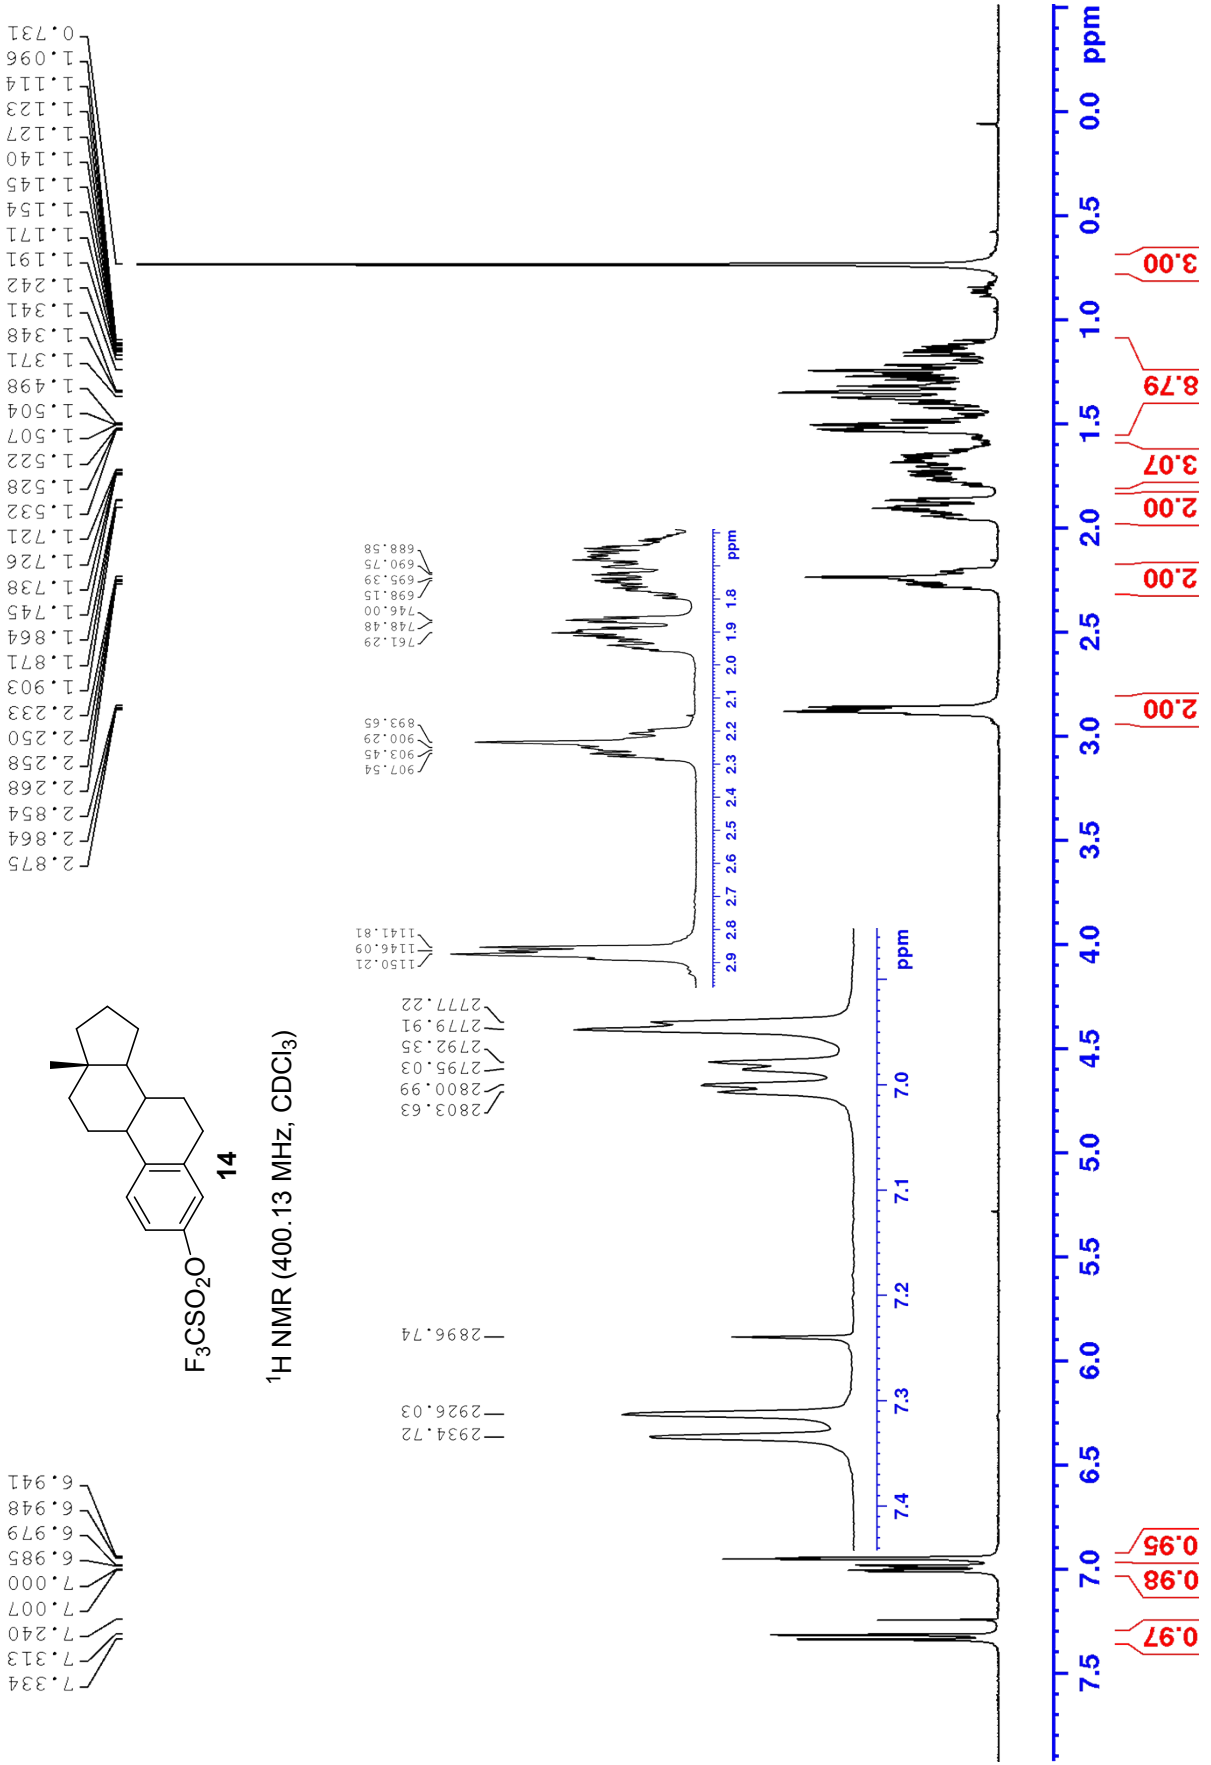

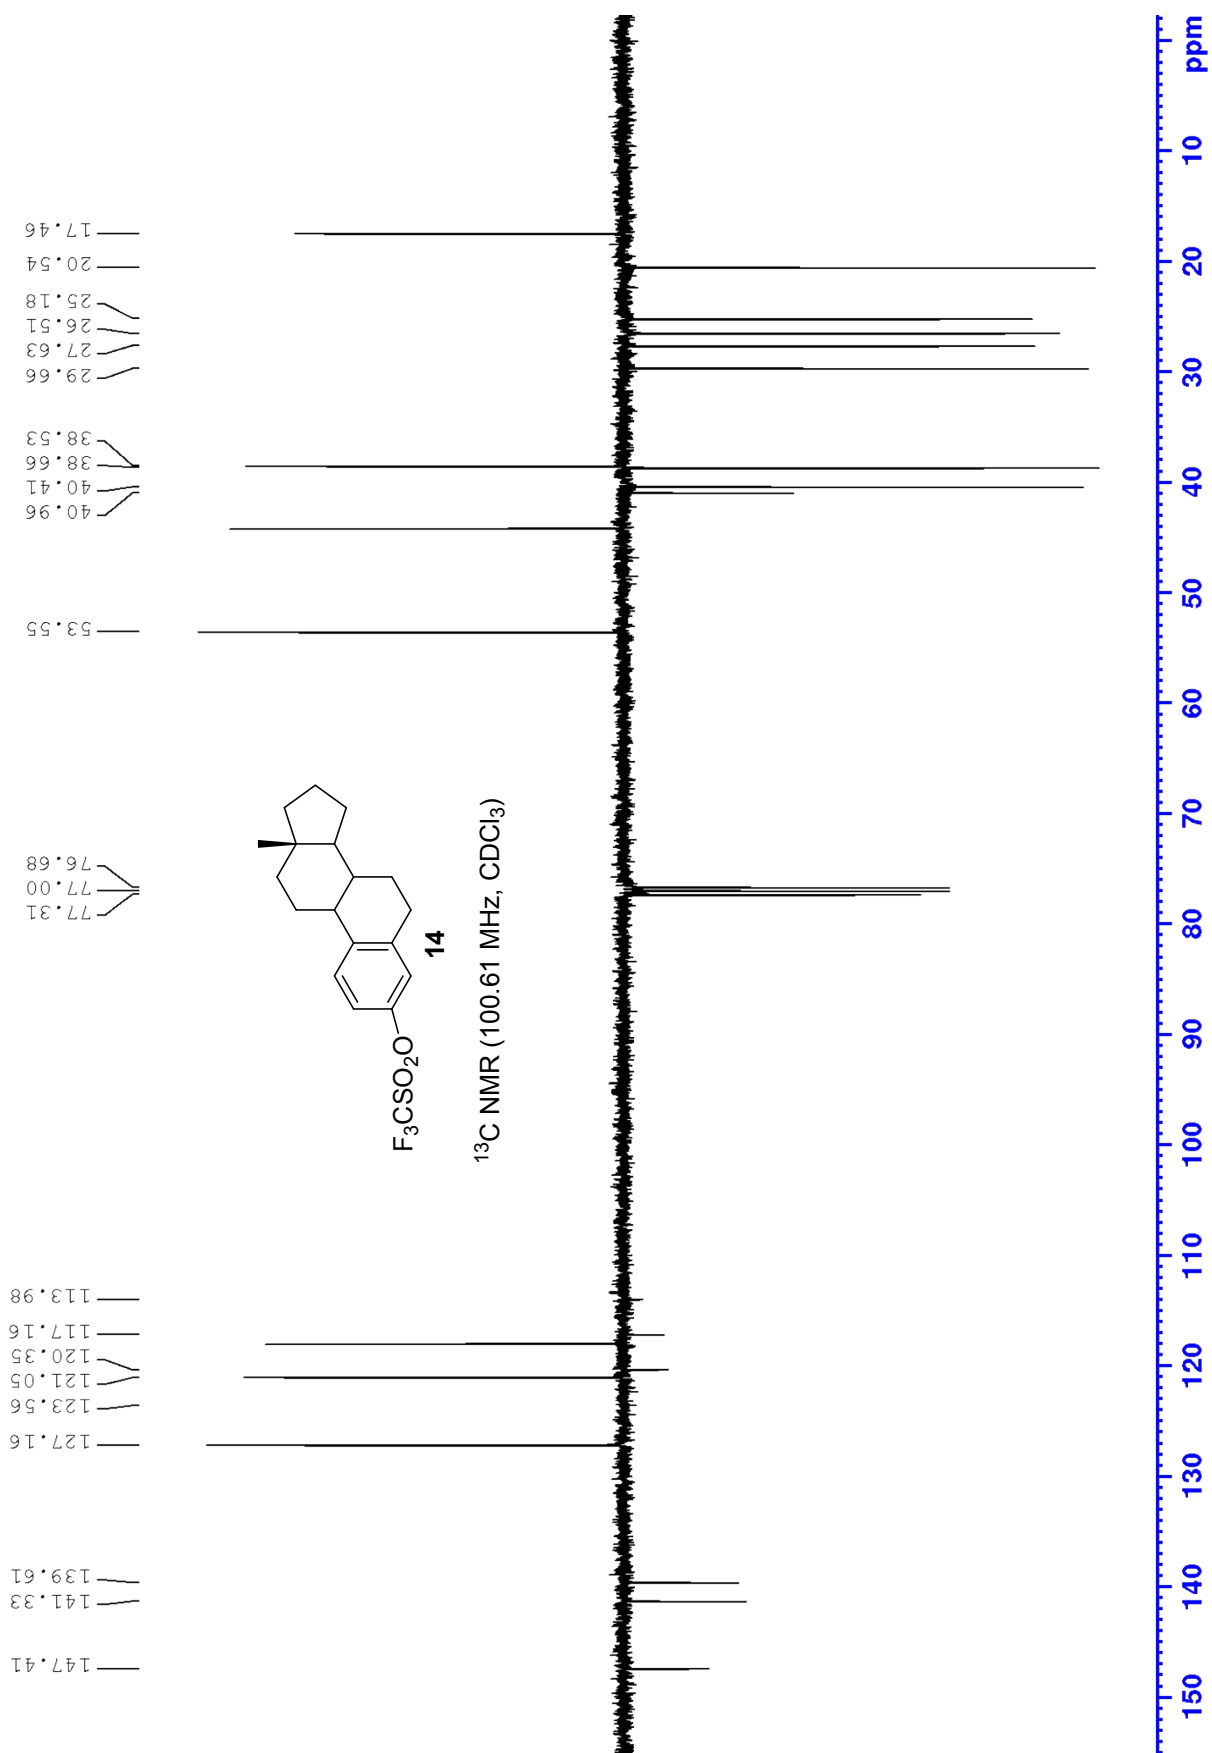

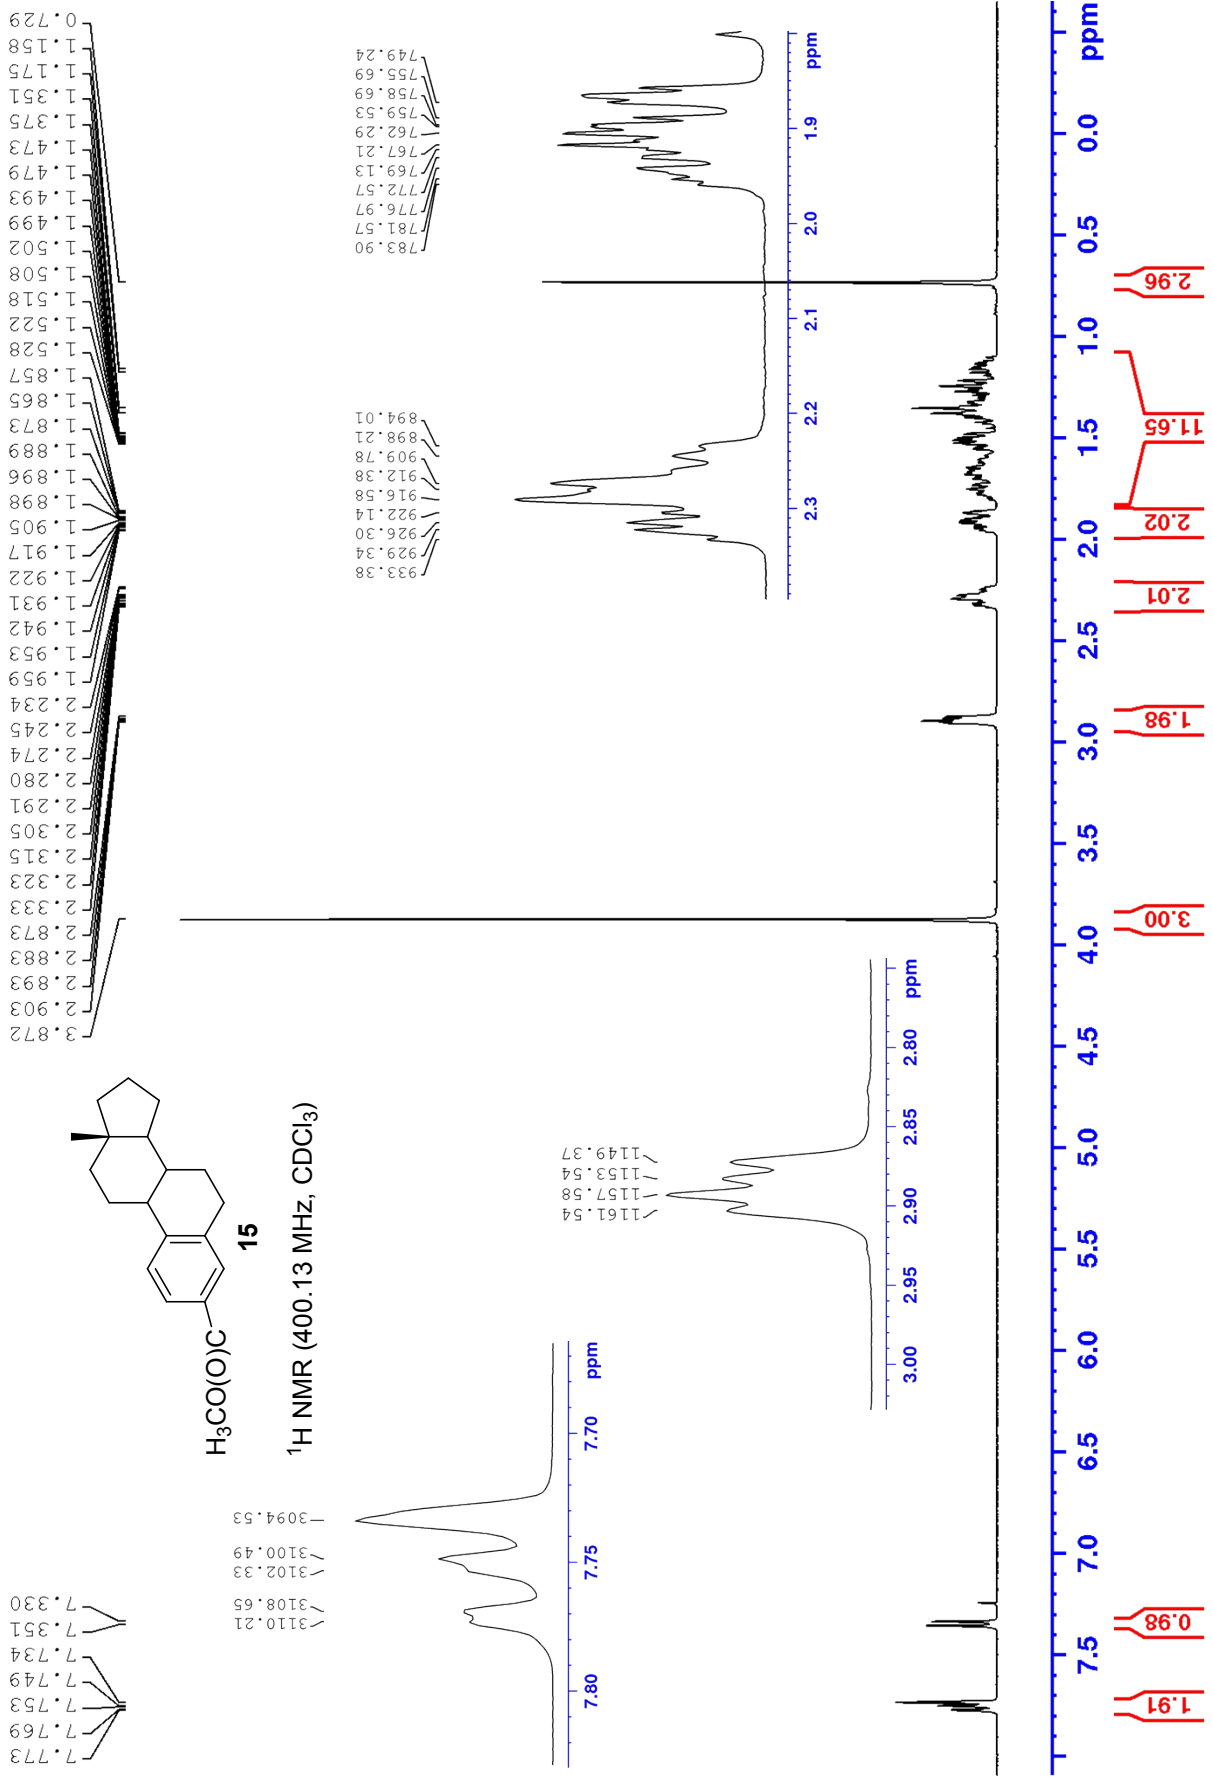

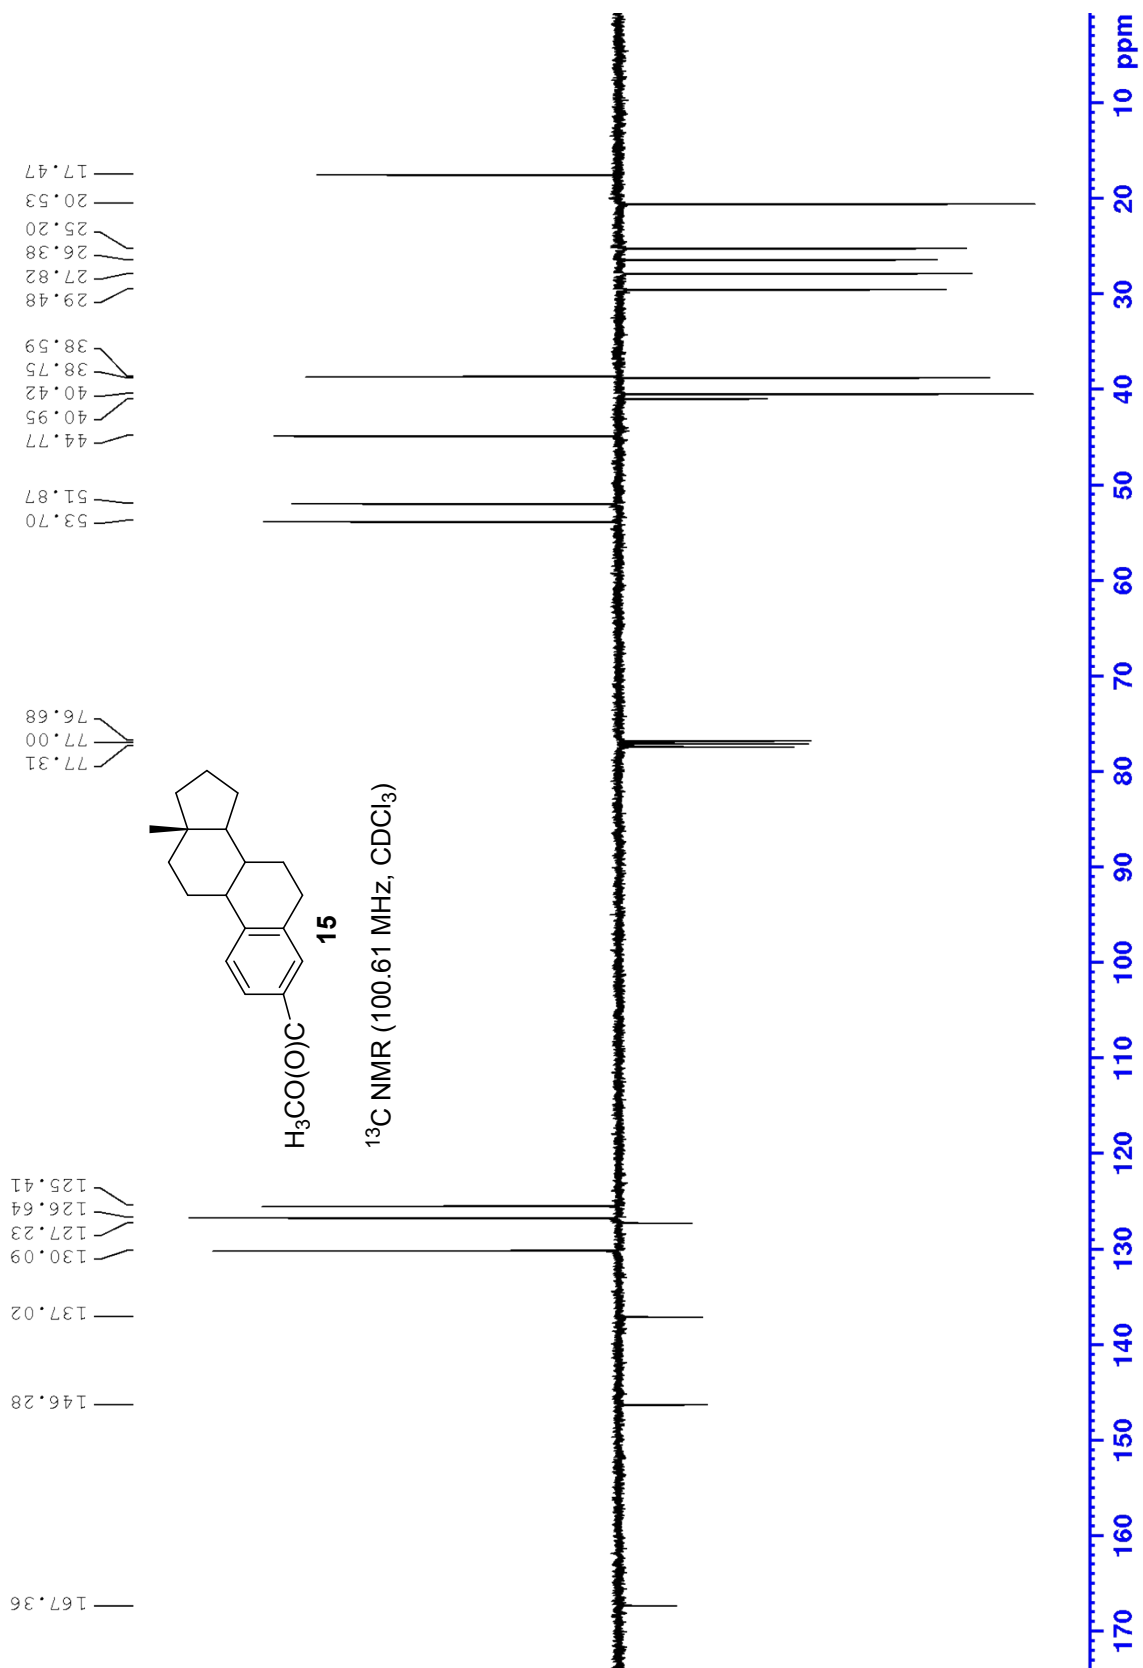

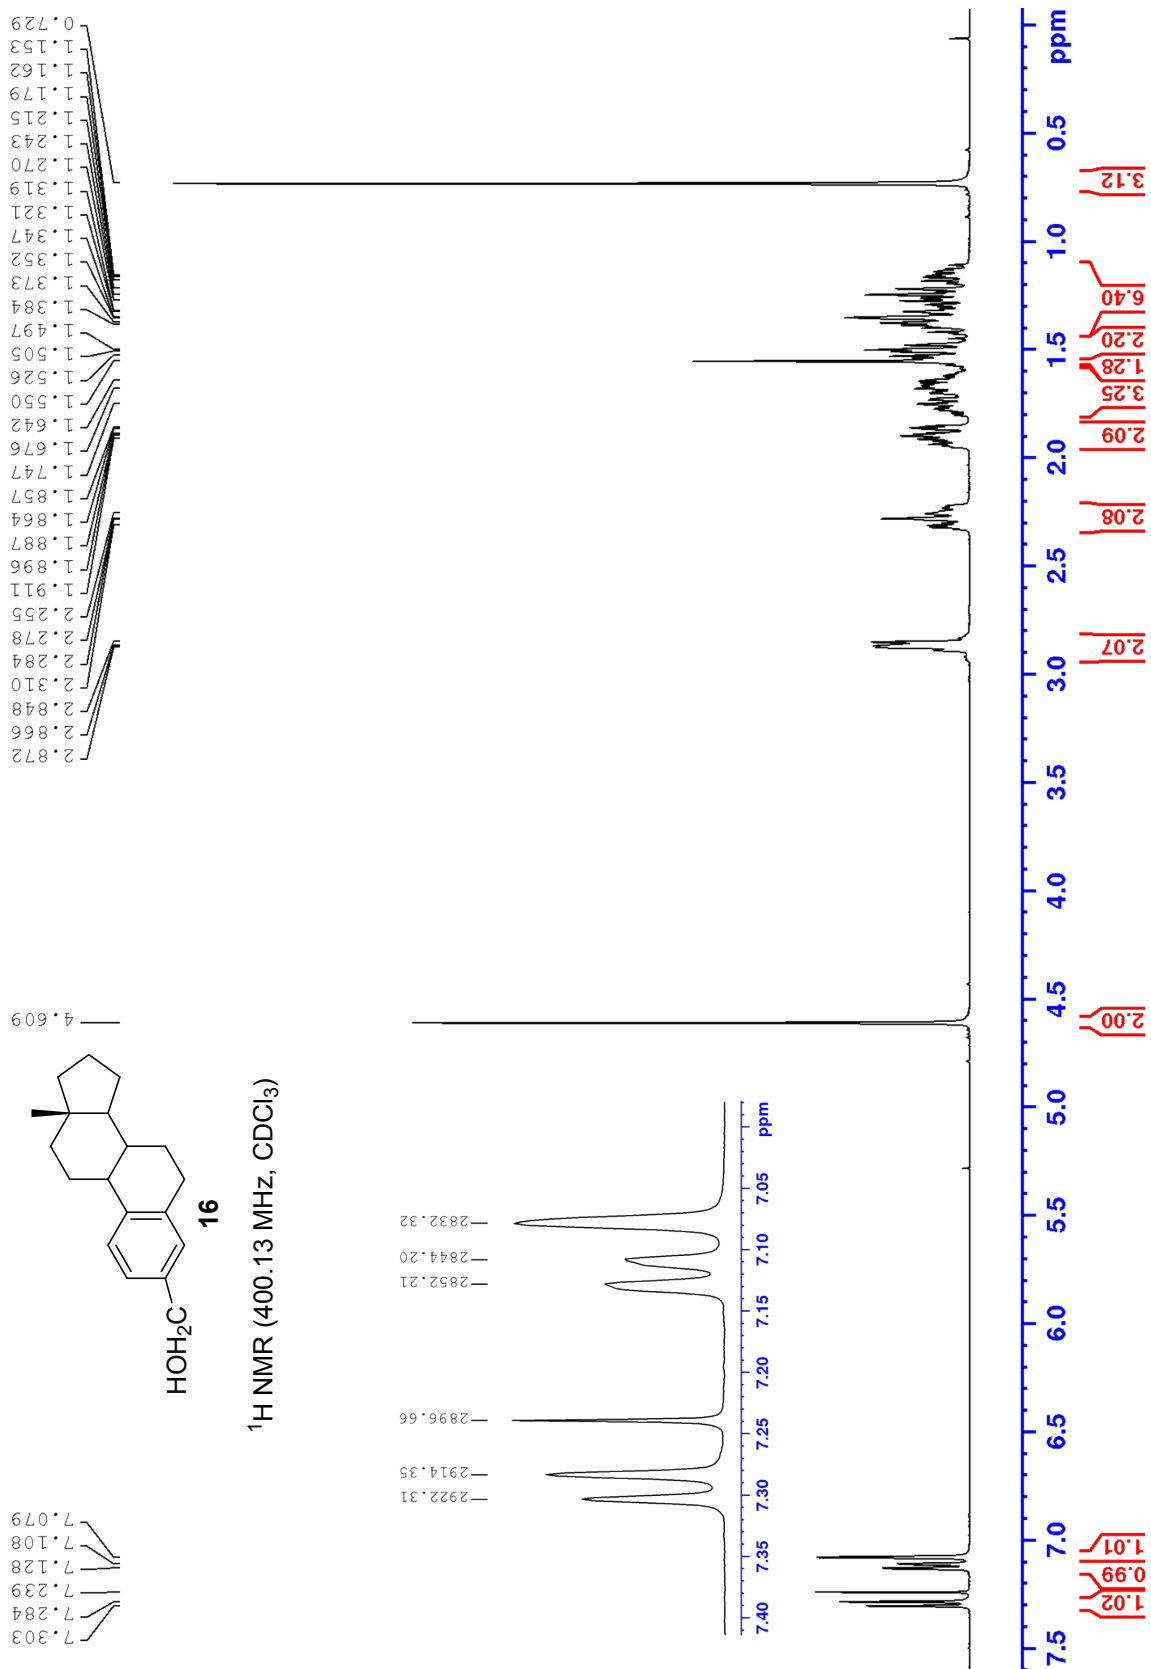

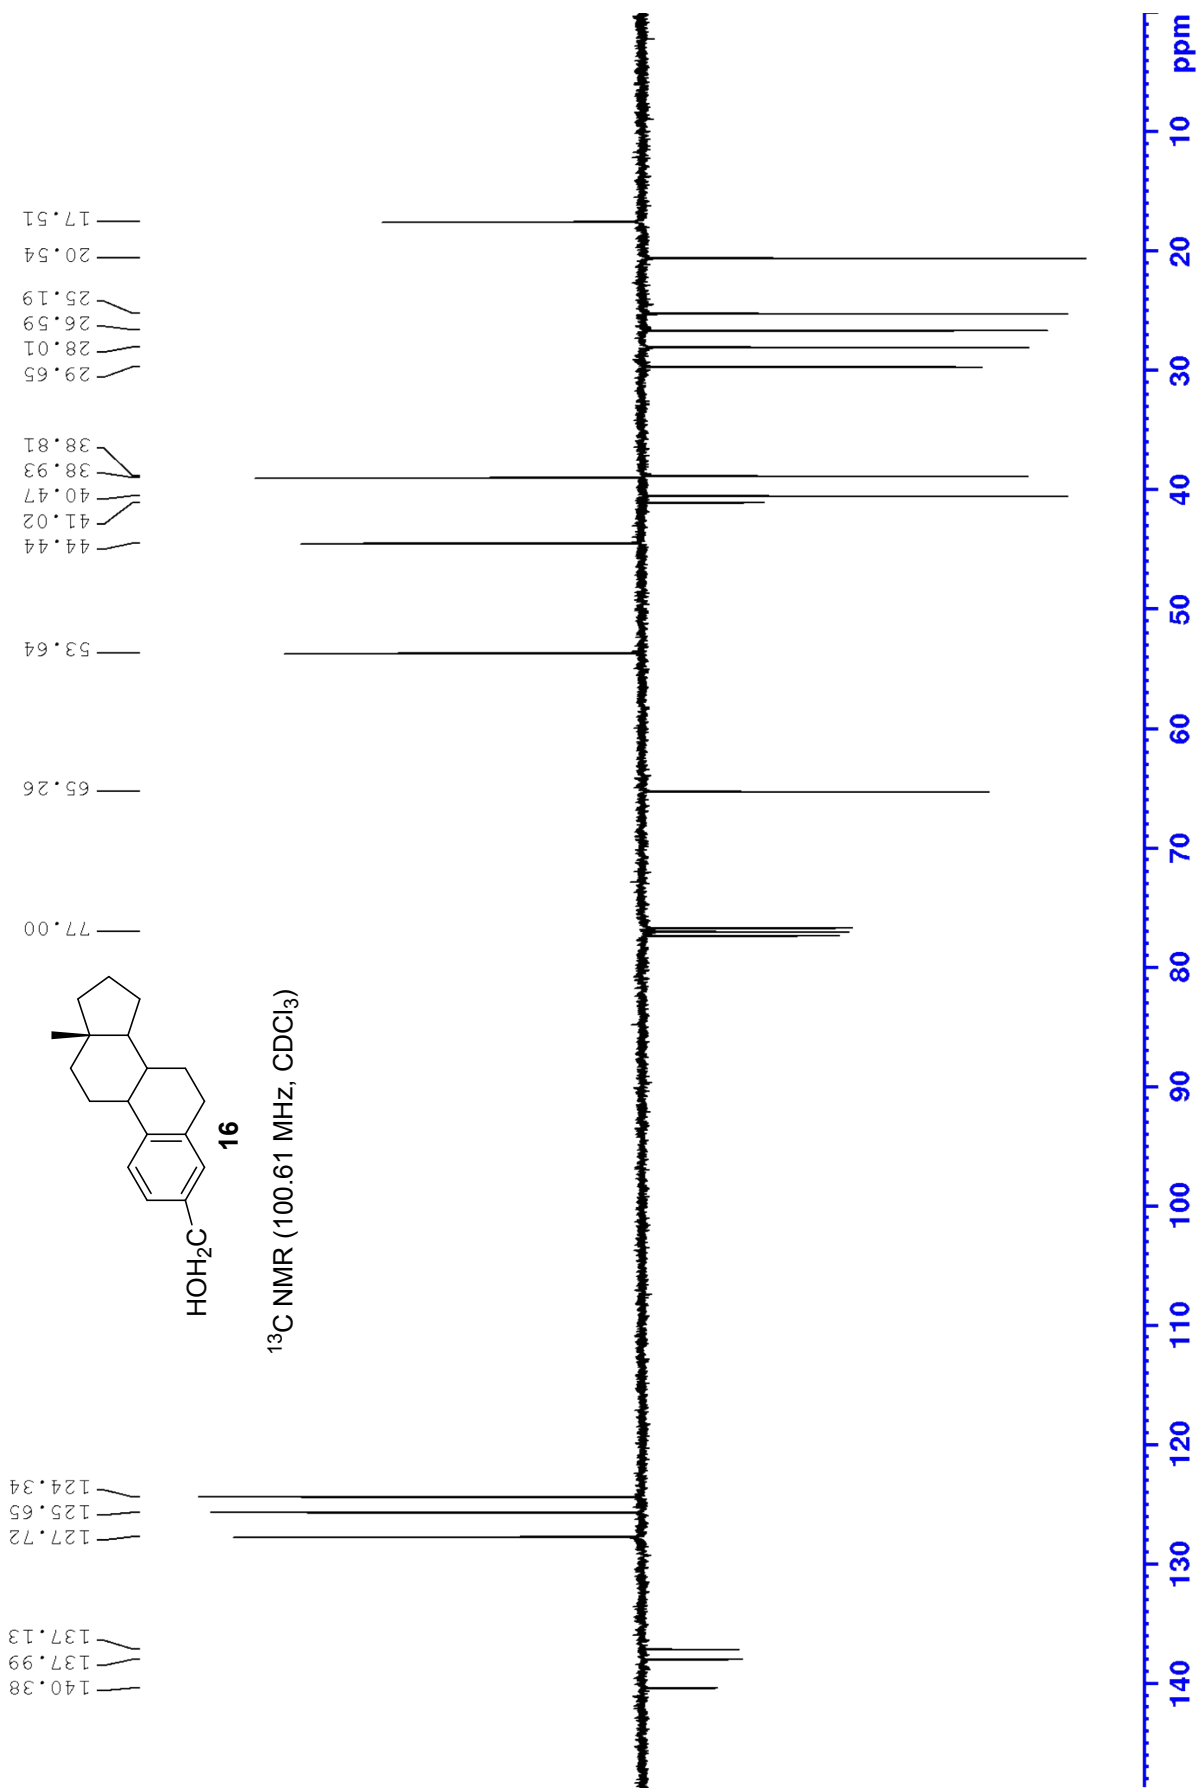

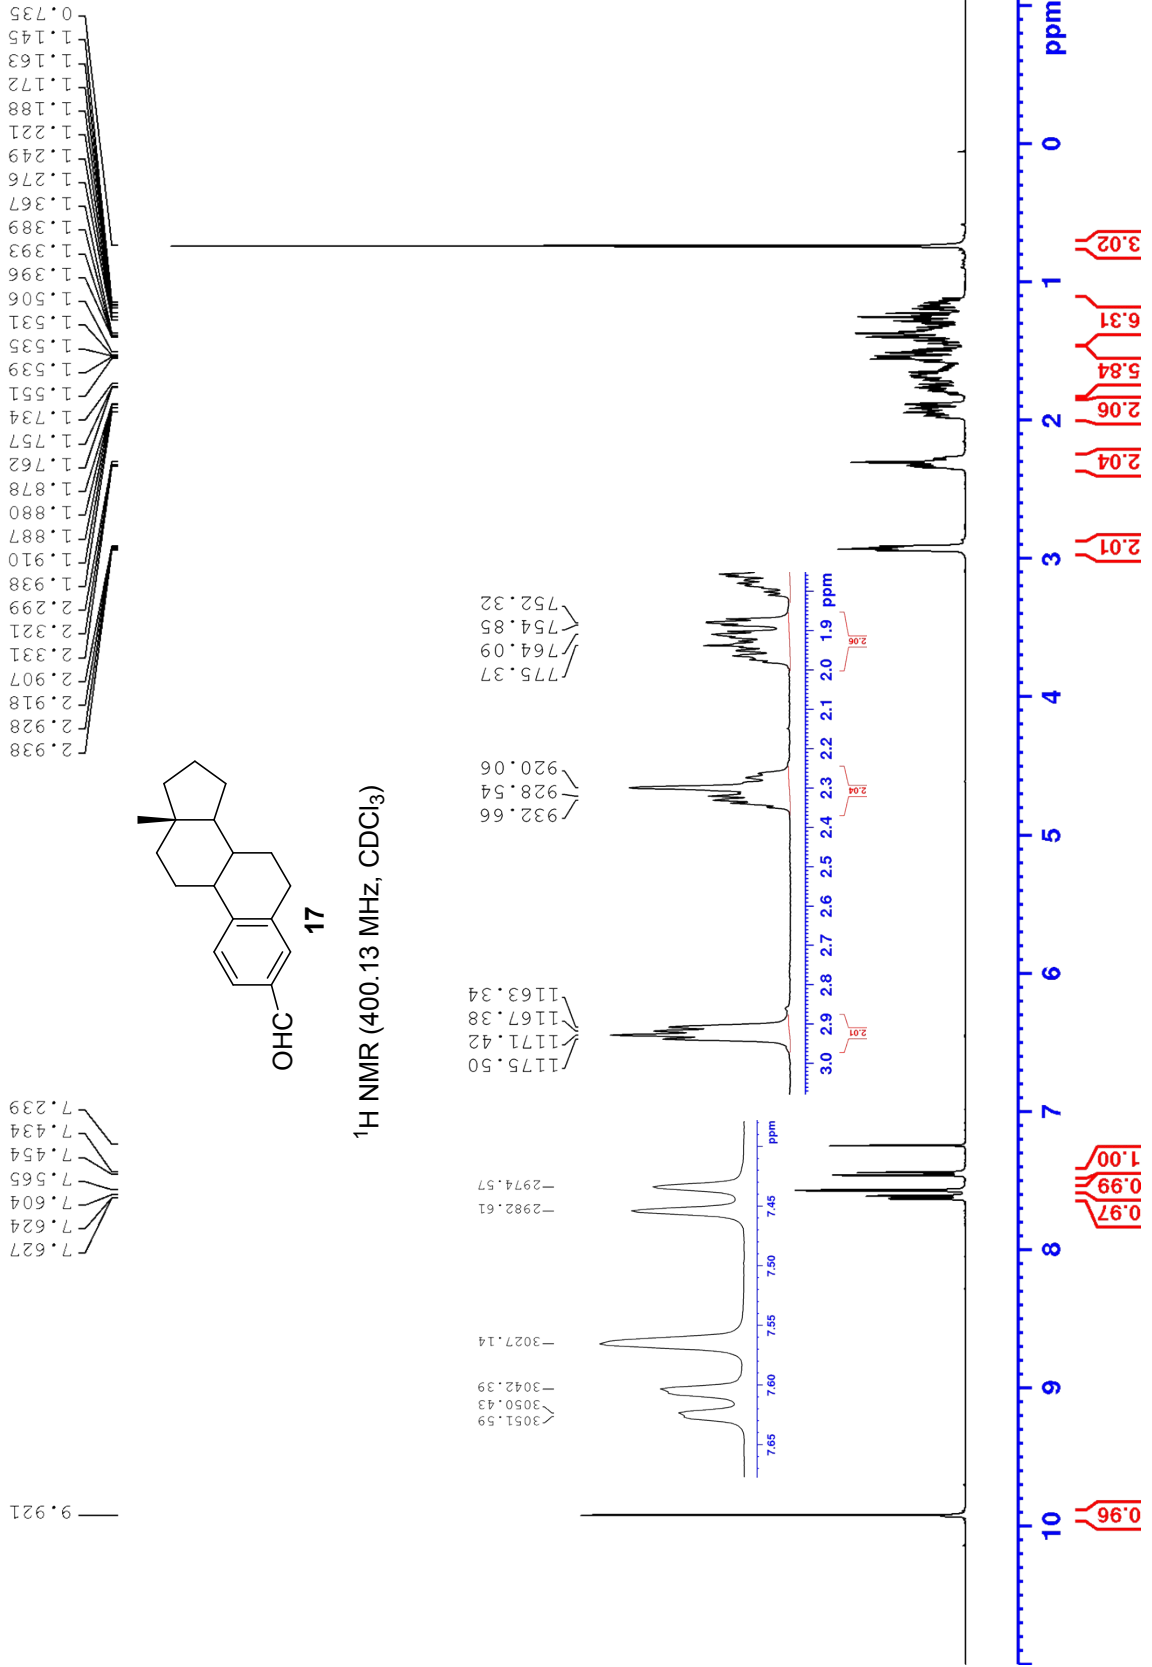

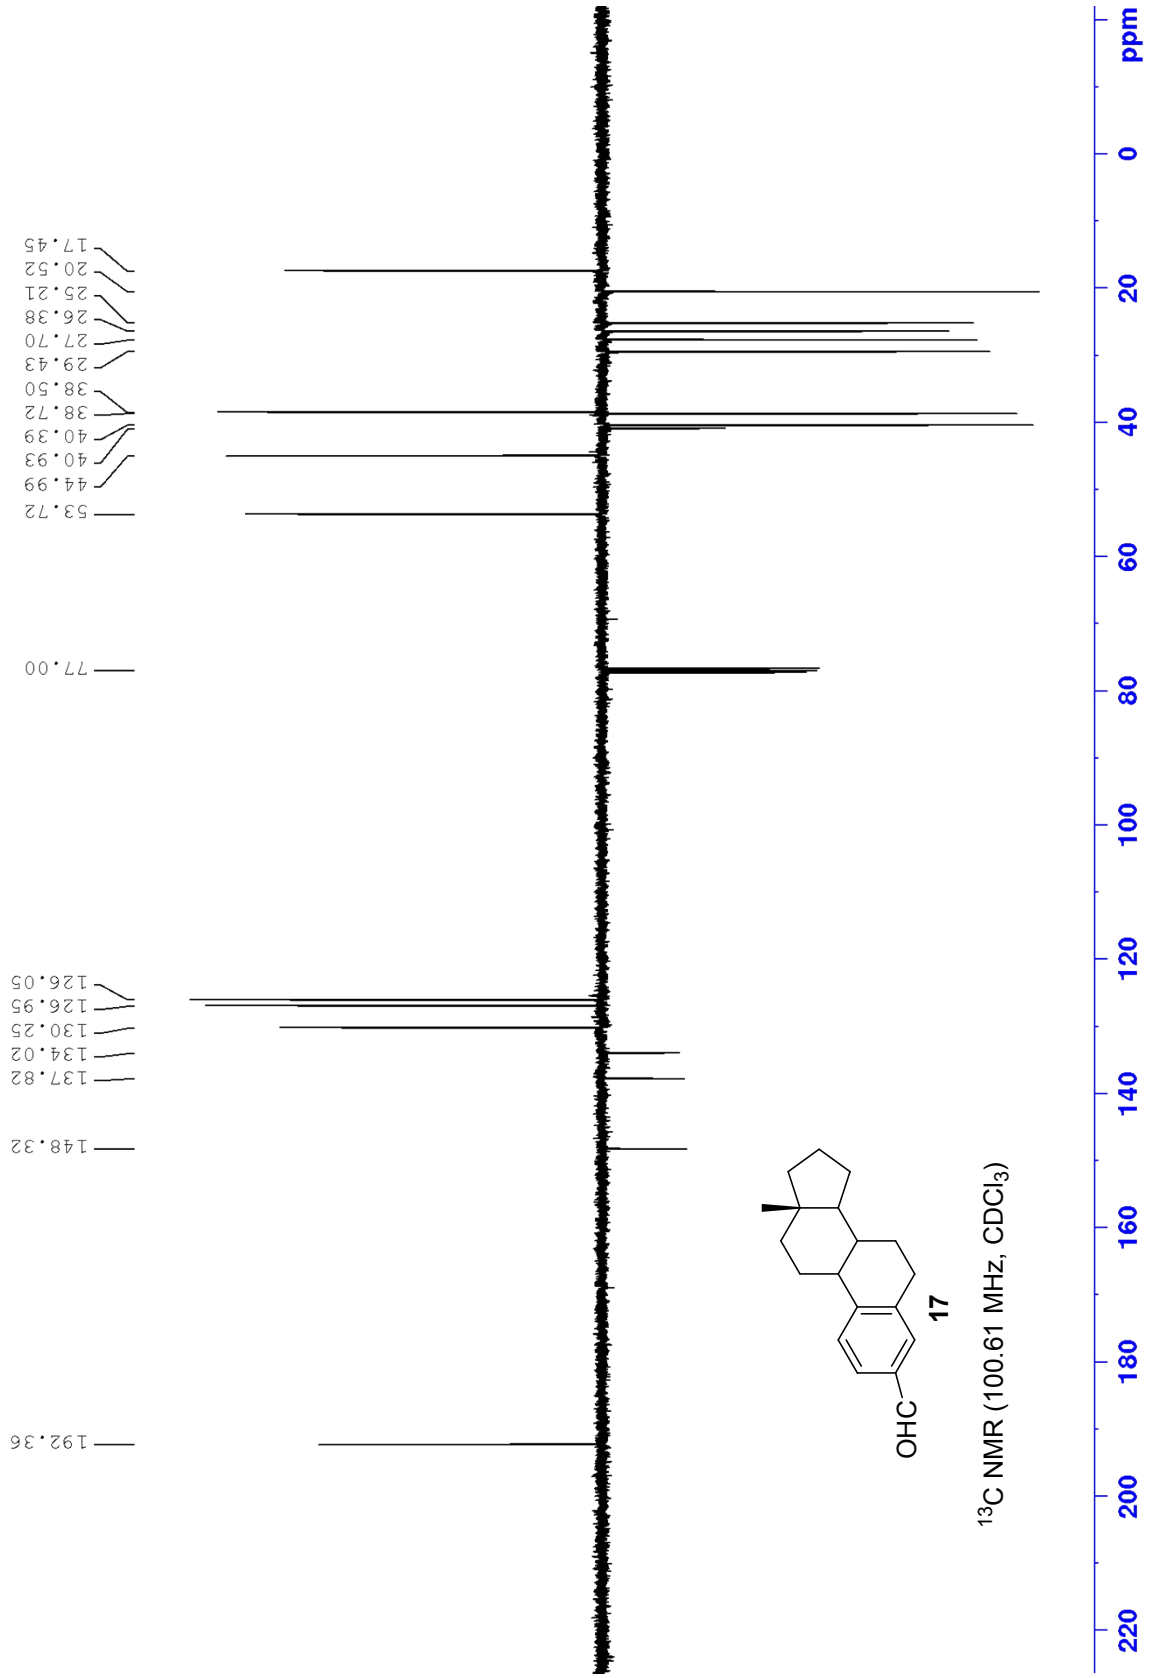



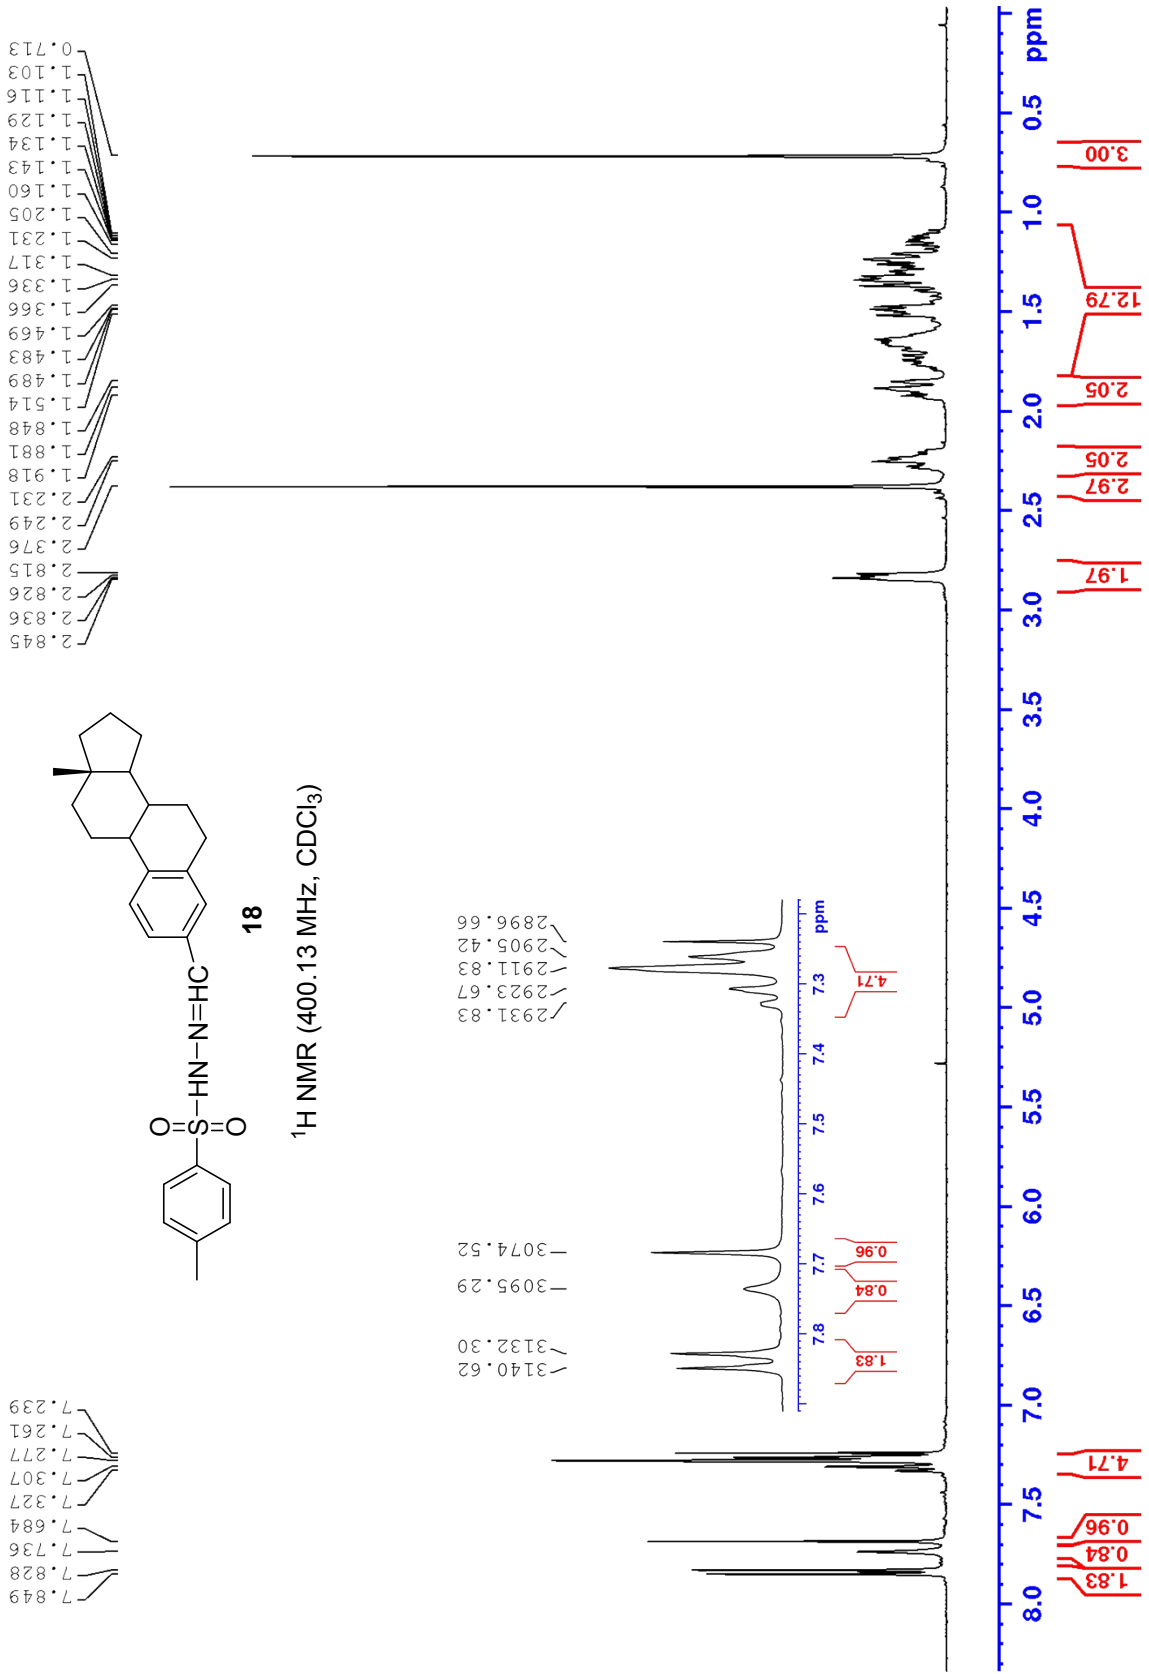

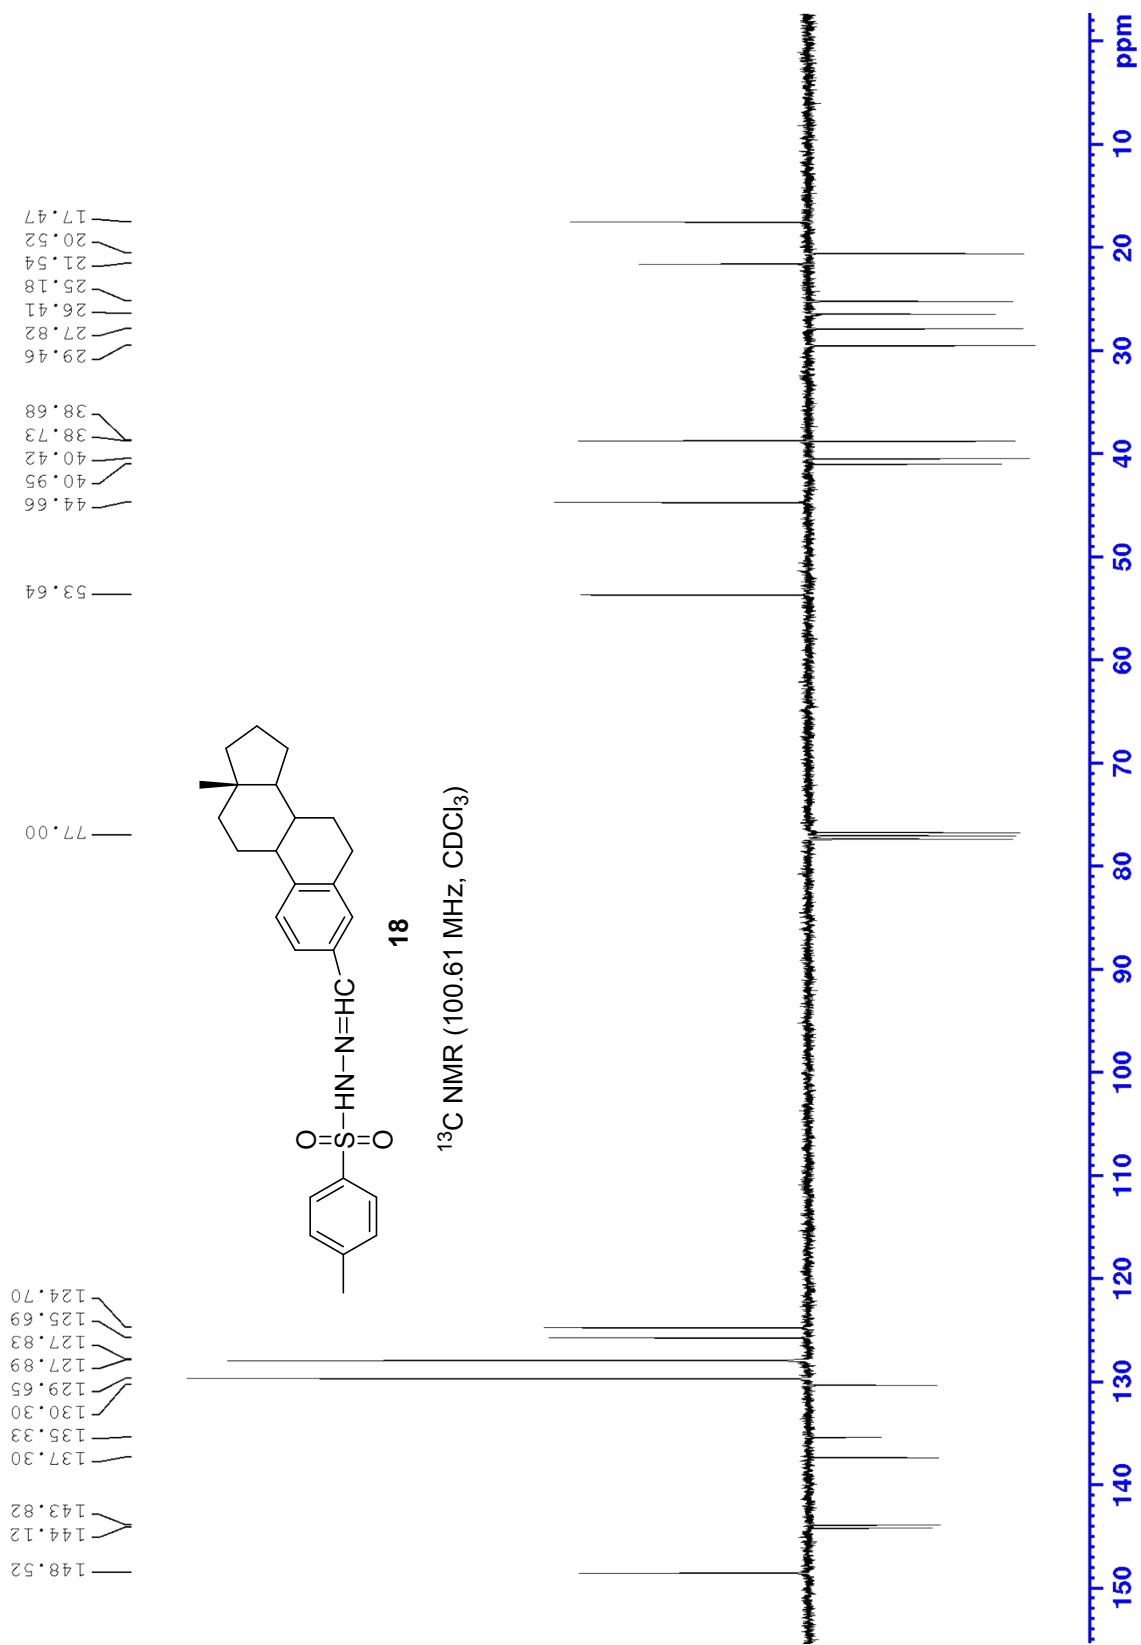

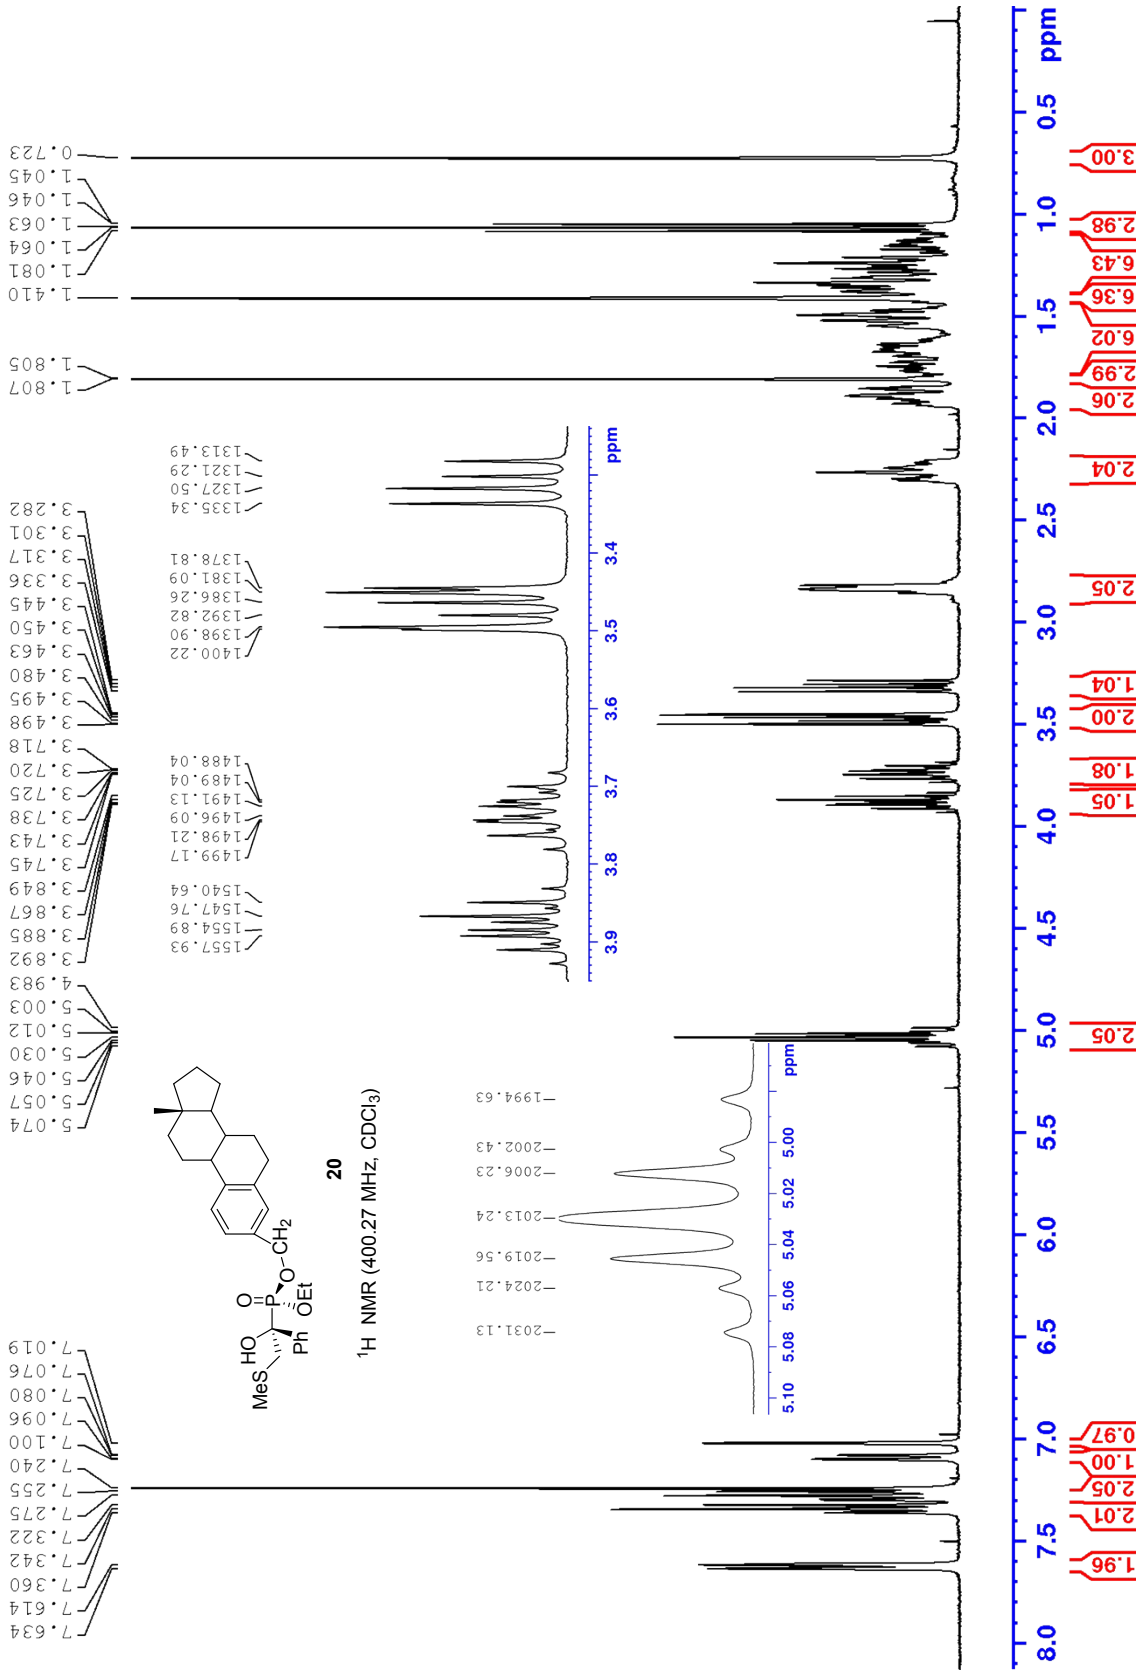

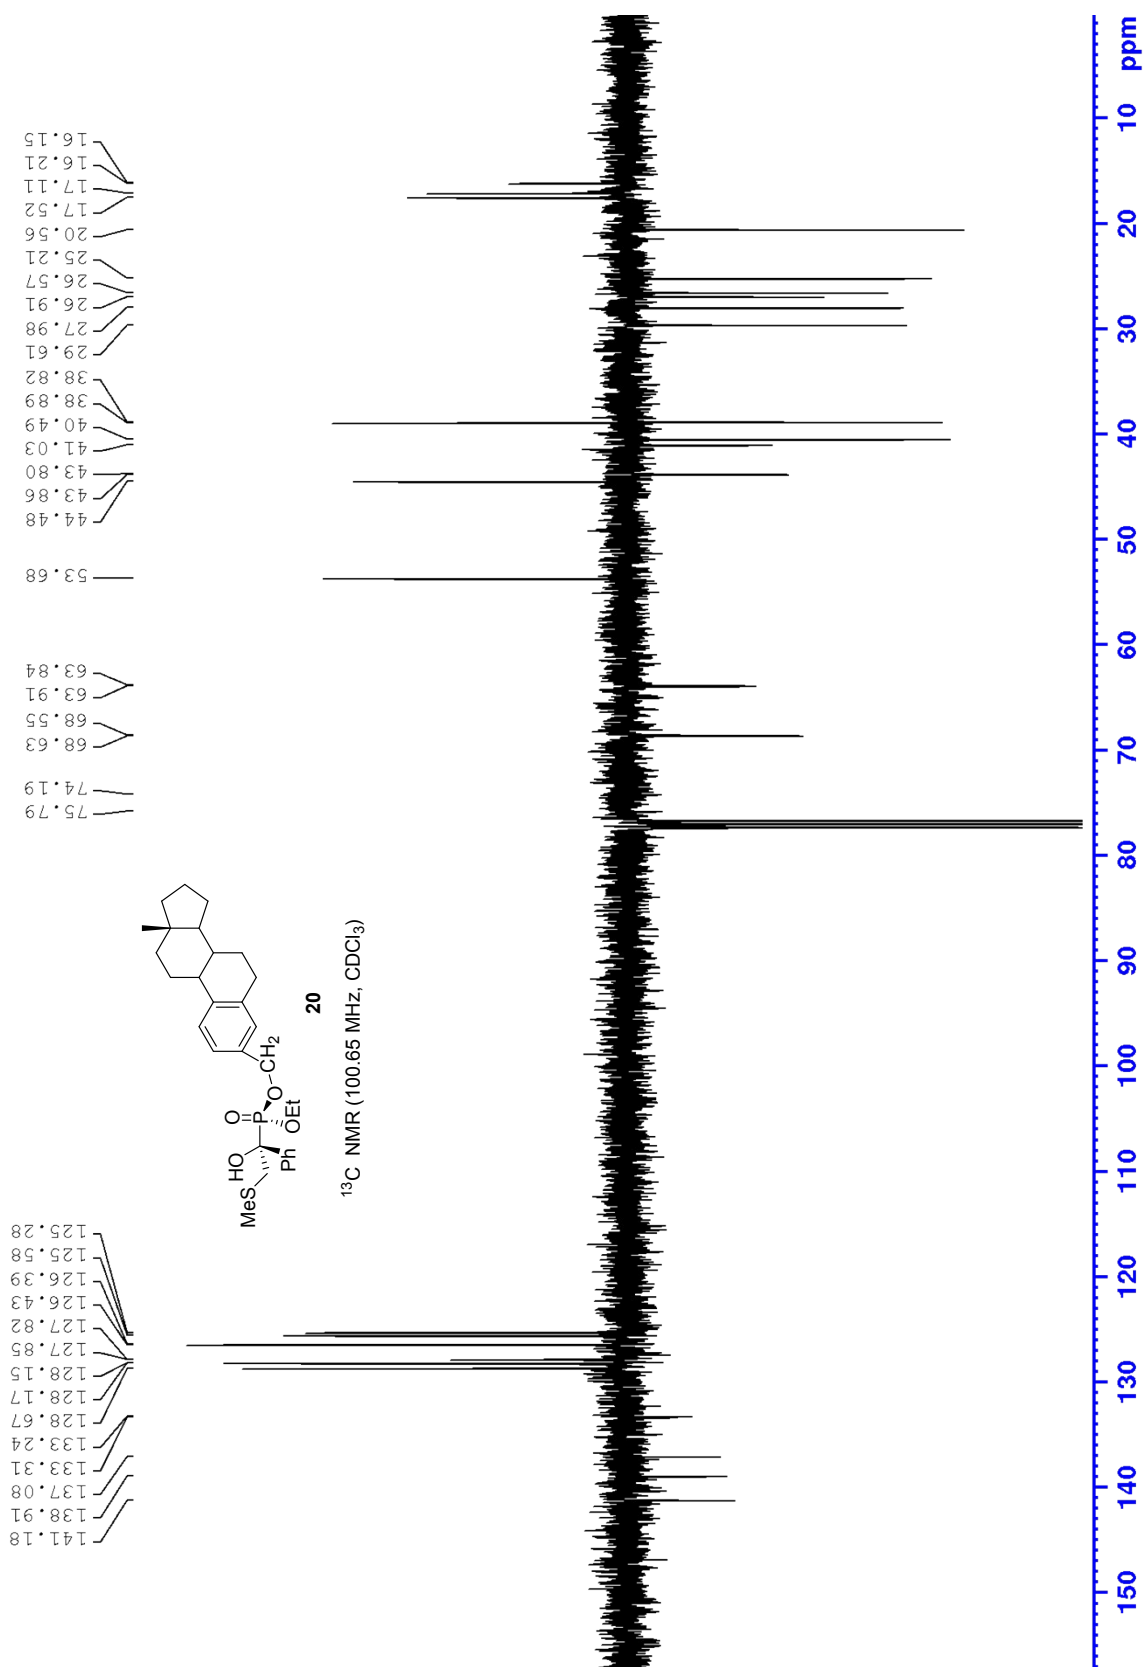

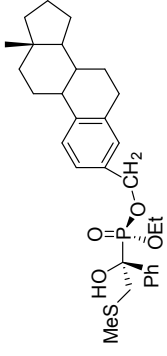**20**<sup>31</sup>P NMR (161.98 MHz, CDCl<sub>3</sub>)

21.37

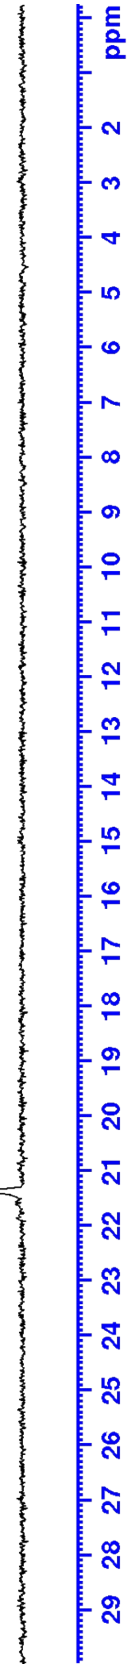

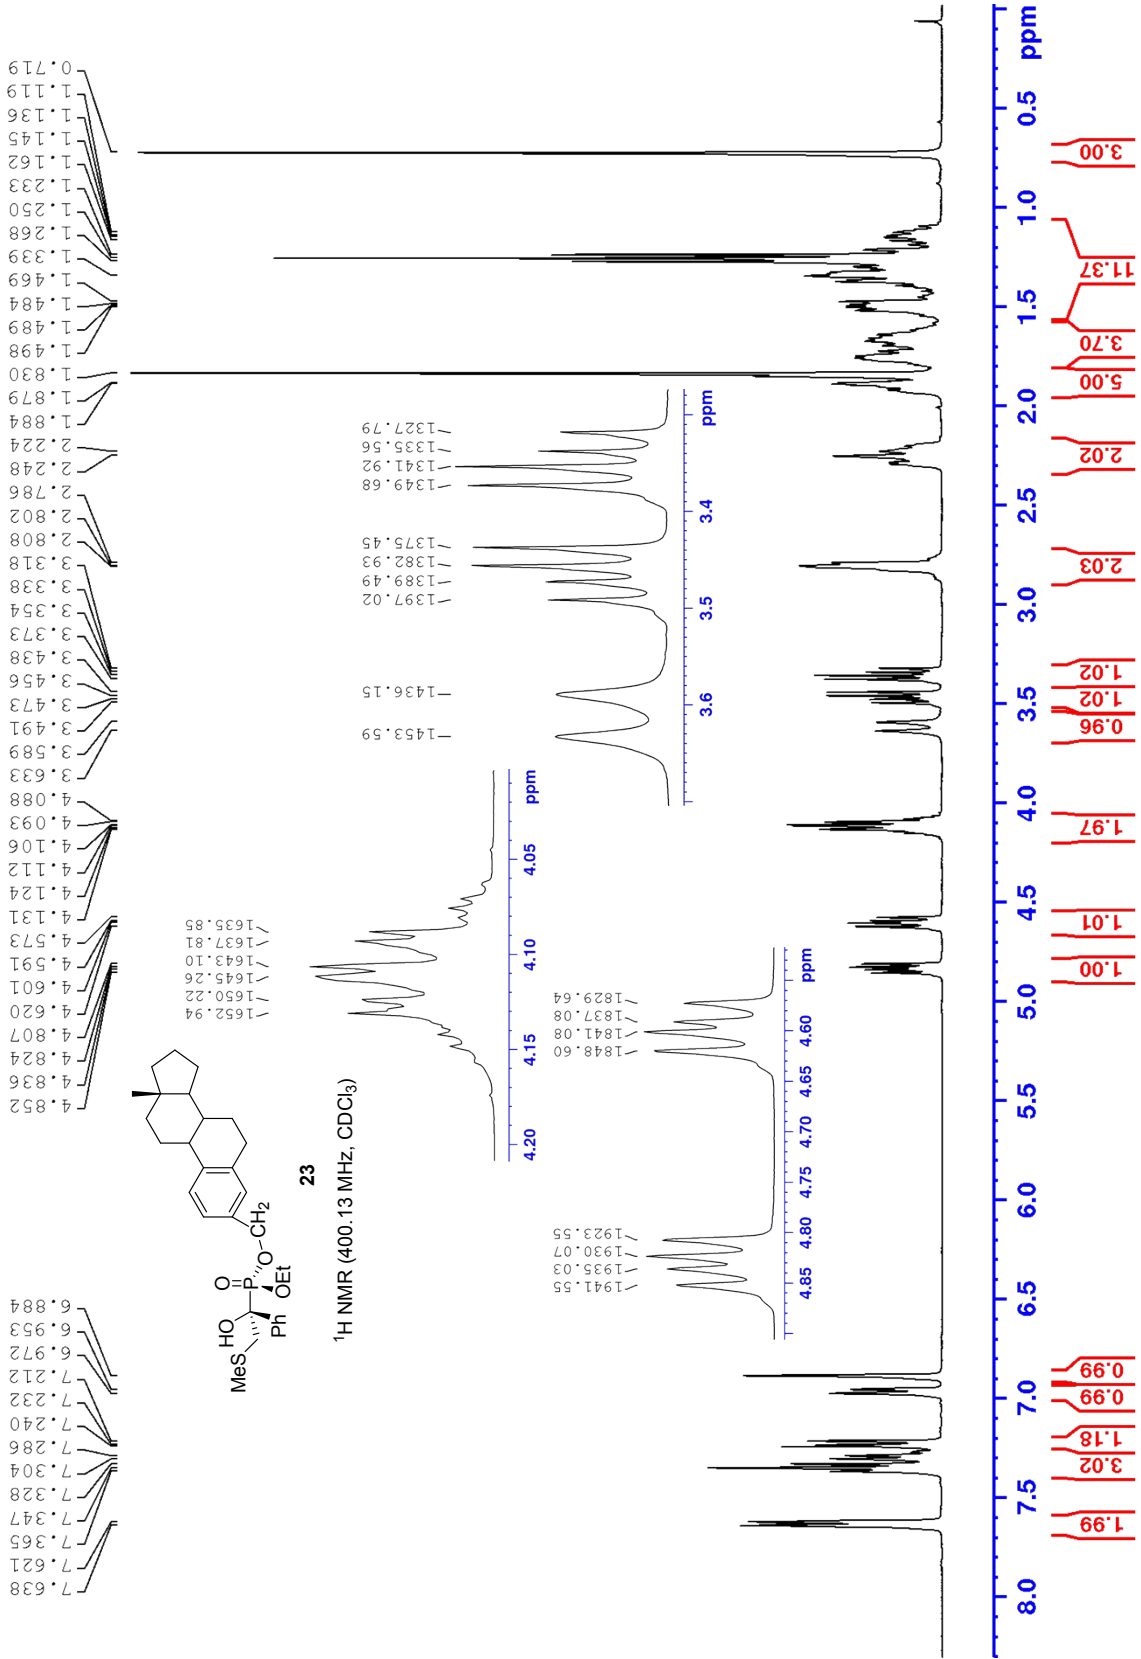

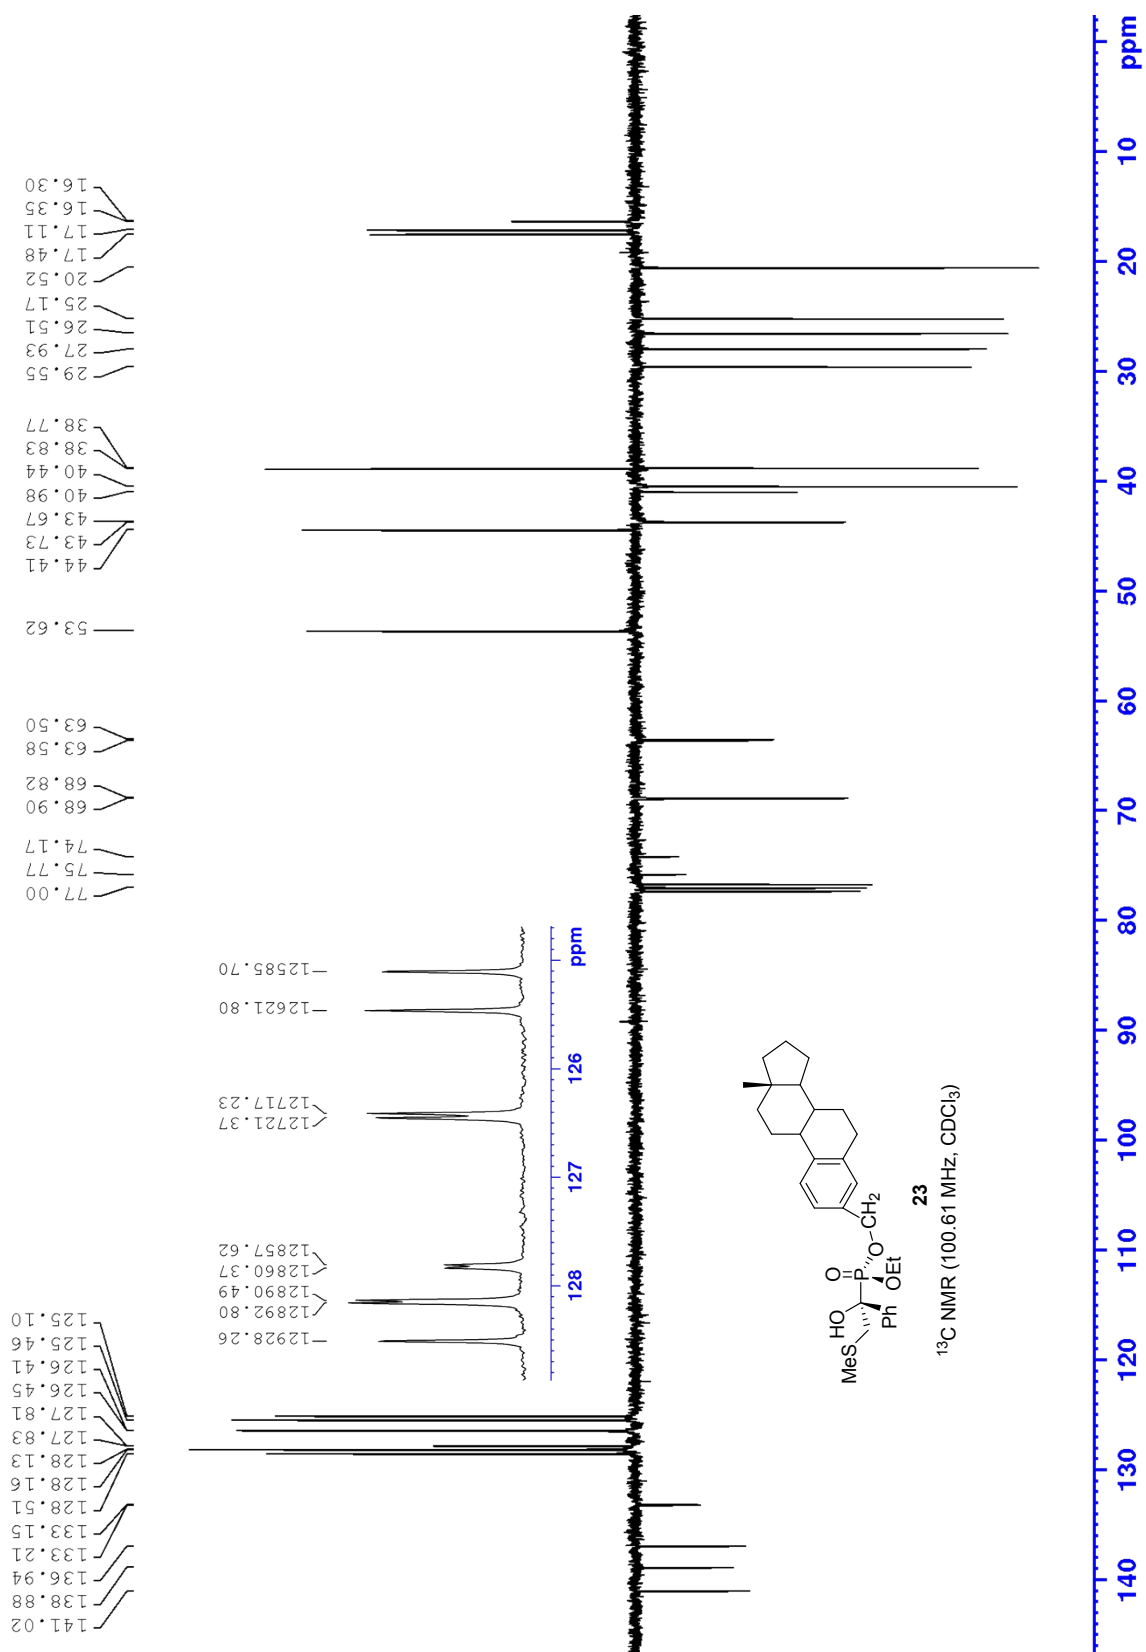

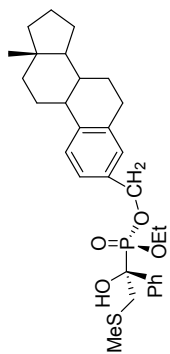**23**<sup>31</sup>P NMR (161.98 MHz, CDCl<sub>3</sub>)

22.13

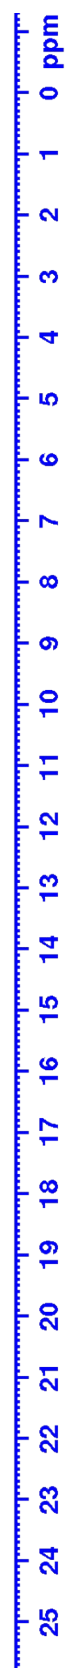



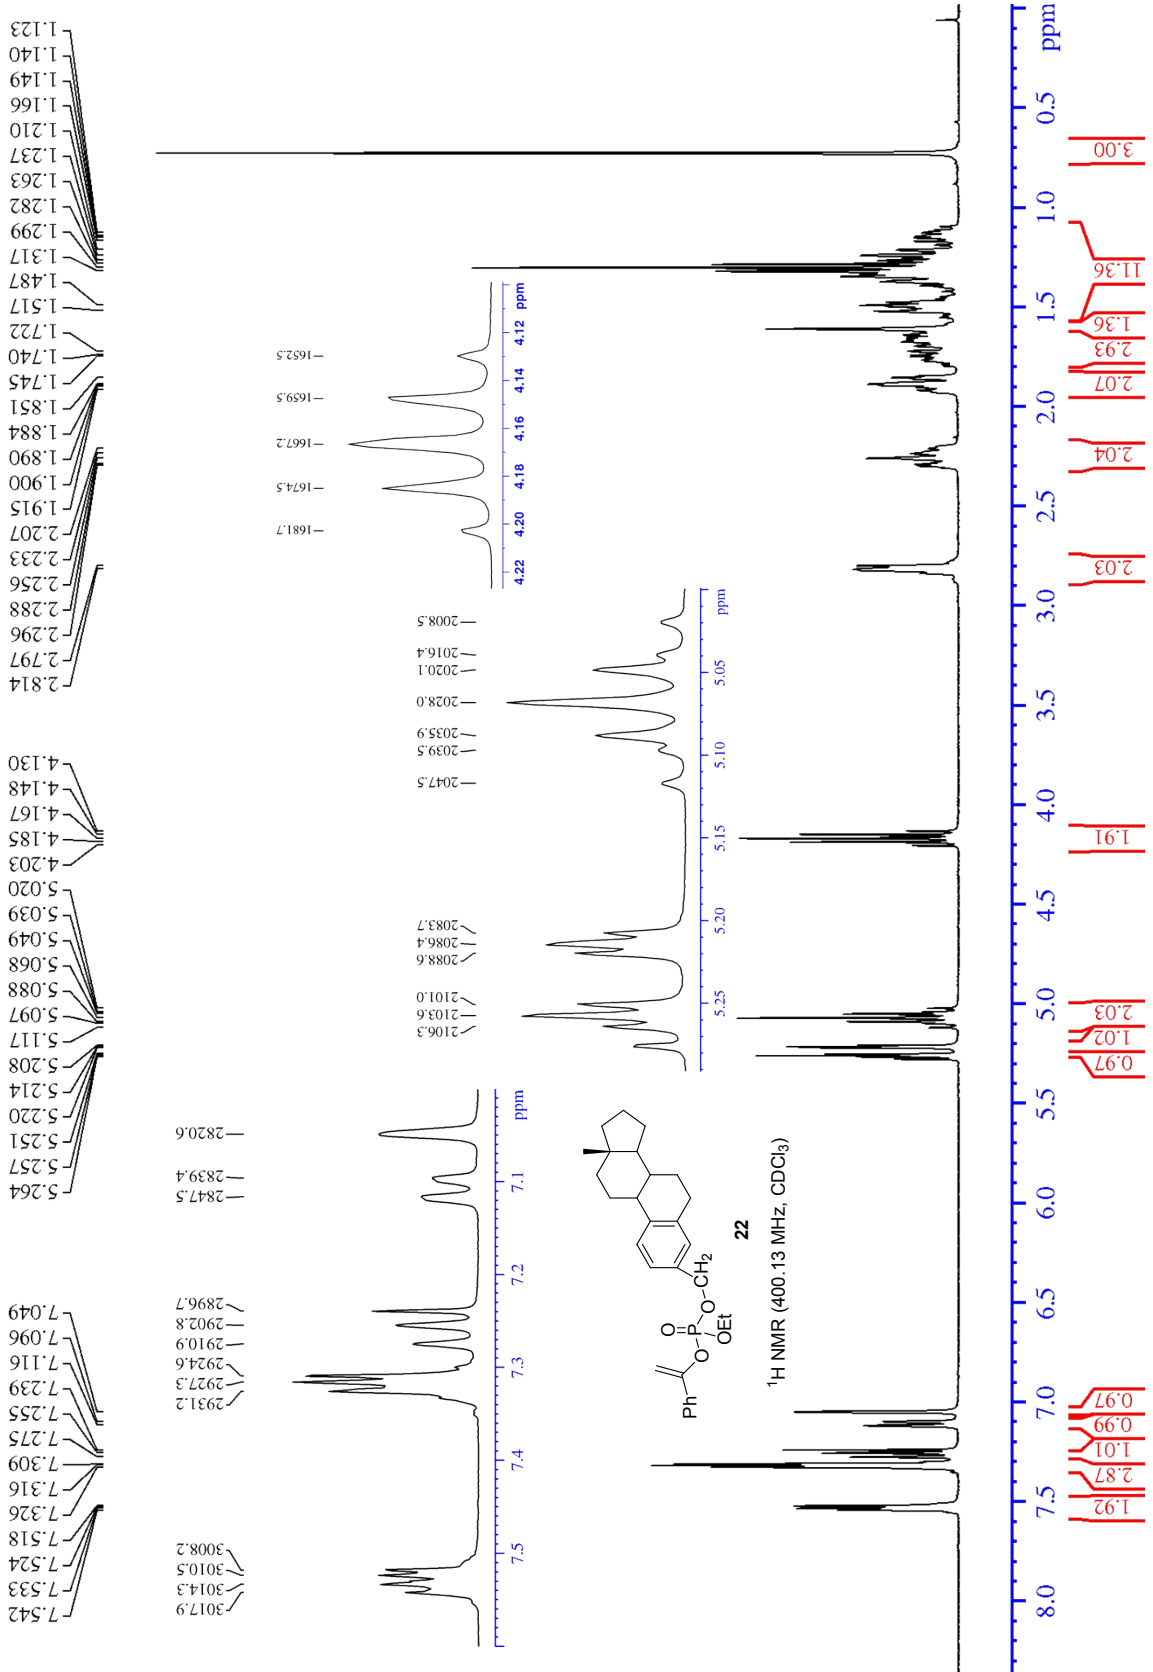

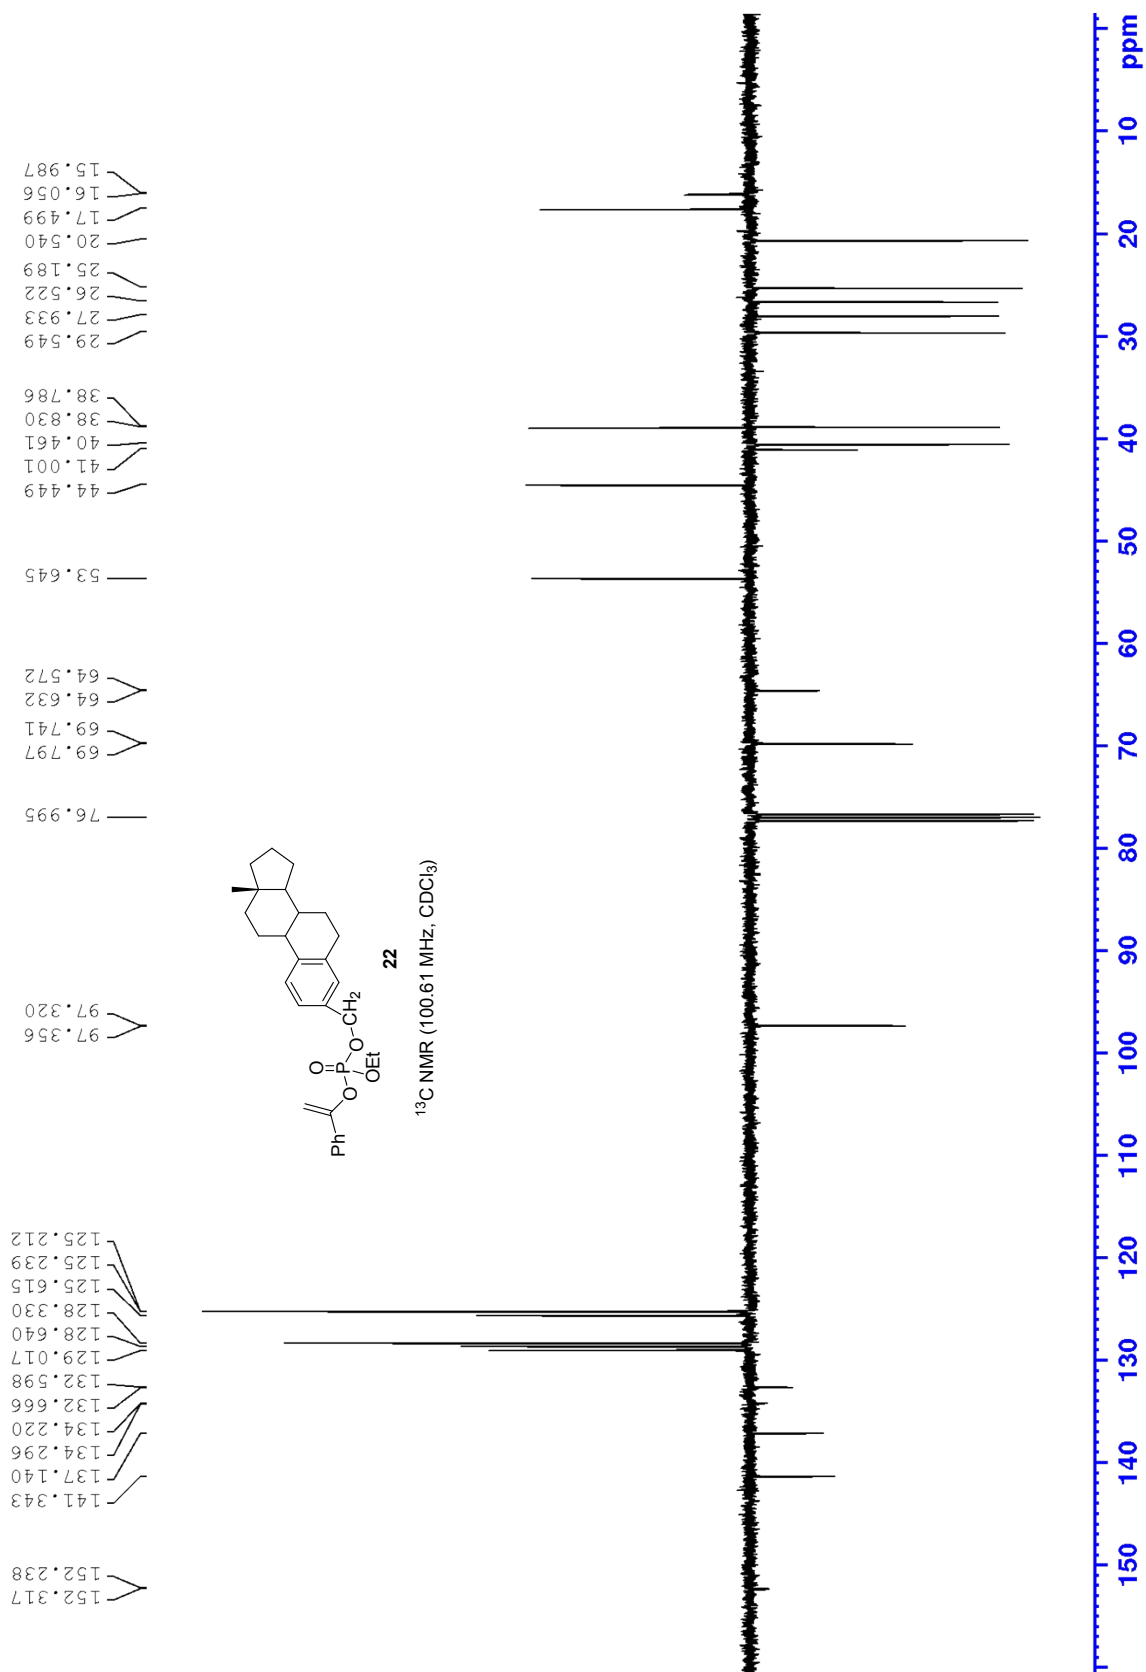

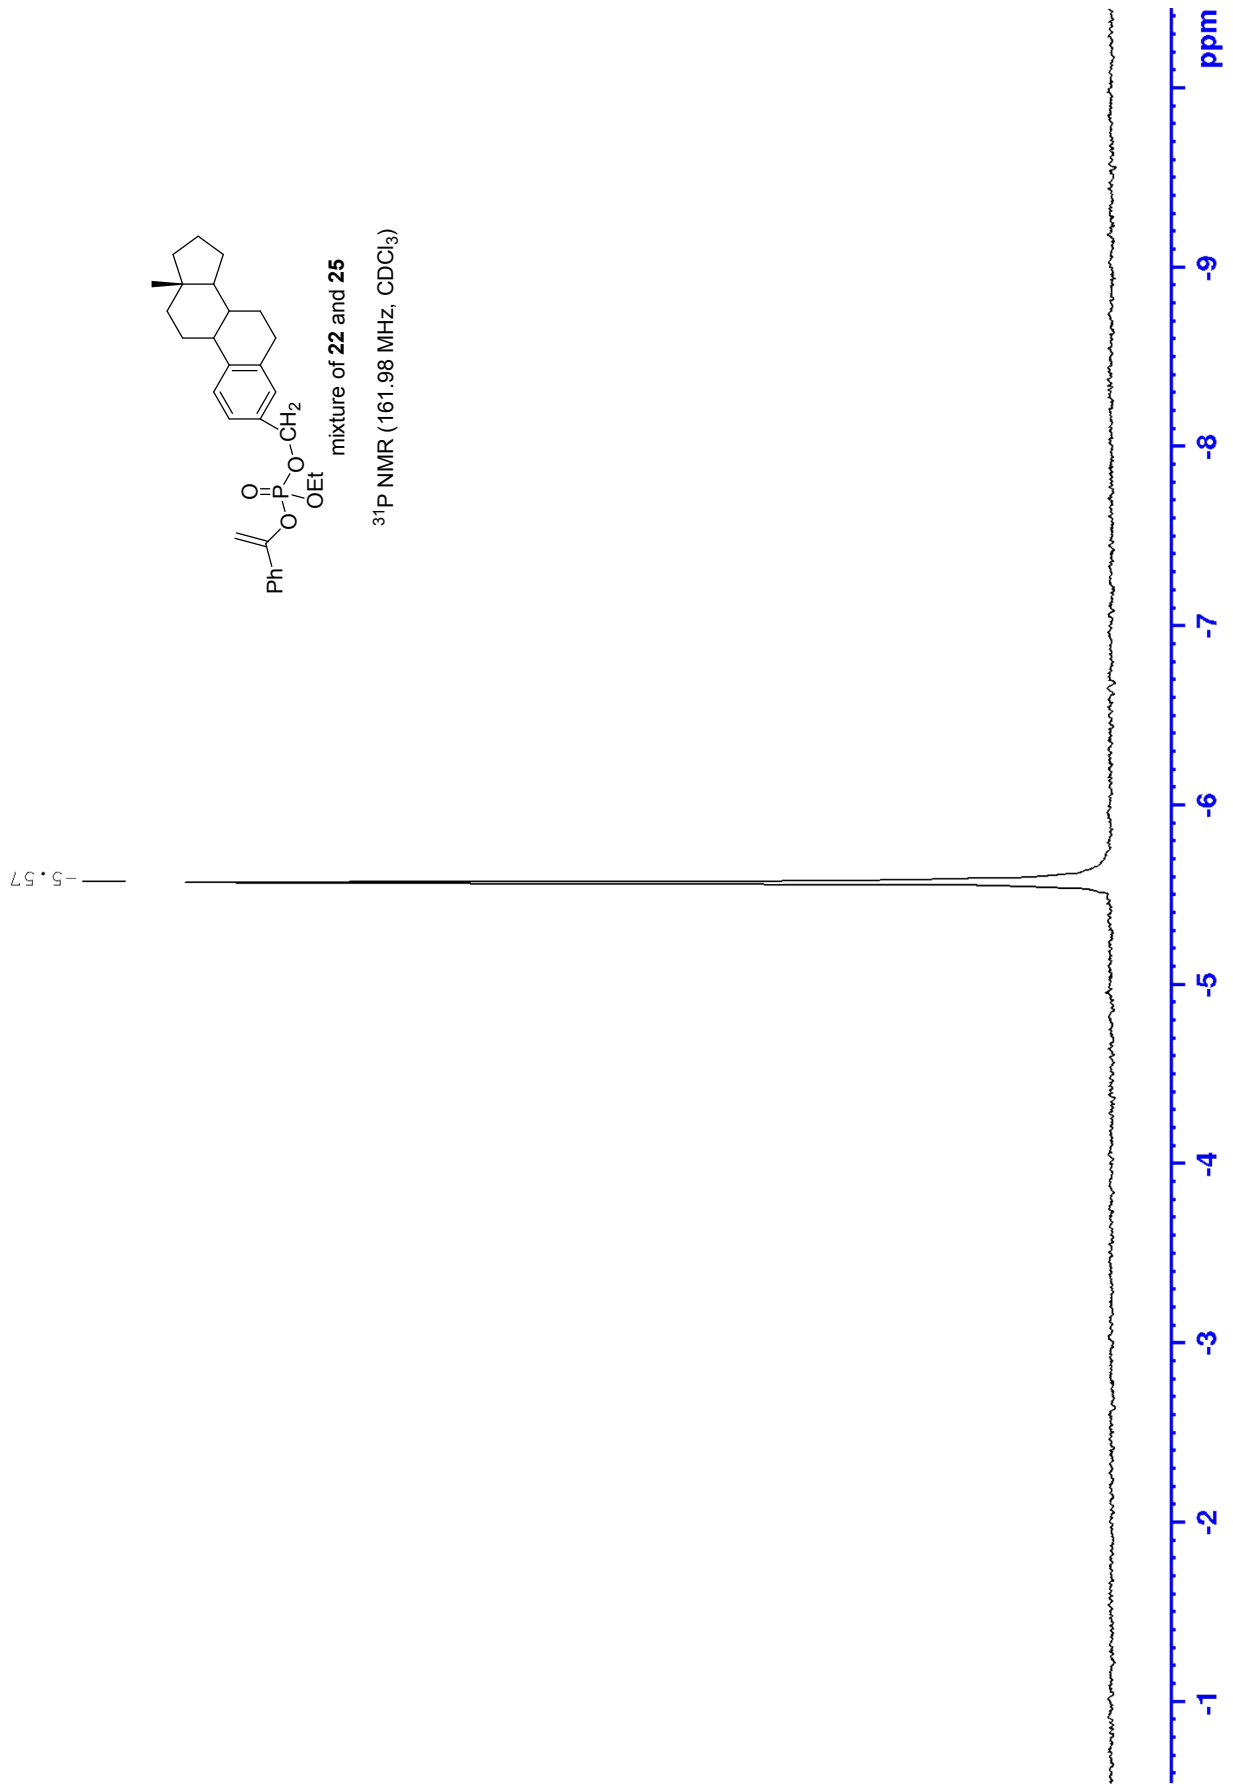

### Single crystal X-ray structure analysis of **23**

Crystals of **23** were obtained by recrystallisation from hexanes/*i*-PrOH. Crystal data and experimental details are given in Table S1. X-ray diffraction data were collected on a *PHILIPS PW1100* four-circle diffractometer using graphite monochromated Mo- $K\alpha$  radiation ( $\lambda = 0.71073 \text{ \AA}$ ) from a sealed tube and a scintillation detector.  $\theta$ - $2\theta$ -scans with a scan range of  $1.2^\circ$ , a scan speed of  $0.5^\circ/\text{min}$ , and stationary background measurements at both sides of each scan were applied. The raw data were corrected for  $L_p$ , system stability, but not for absorption. The structure was solved with direct methods using program *SHELXS97*<sup>1</sup> and structure refinement on  $F^2$  was carried out with program *SHELXL97*<sup>1</sup>. All non-hydrogen atoms were refined anisotropically. Hydrogen atoms were inserted in idealized positions and were refined as riding on the atoms to which they are bonded. The absolute structure was assigned *via* the known handedness of the 1,3,5(10)-estratriene-3-yl moiety of **20**. For geometric analysis of the structure program *PLATON*<sup>2</sup> was used and selected bond distances and angles are reported in Table S2. Structure graphics (Fig. S1 and S2) was generated with program *MERCURY*<sup>3</sup>. The structure contains an intermolecular hydrogen bond between the C-bonded OH group of O1 as the donor and the phosphonate oxygen O2 as the acceptor (O1–H1 =  $0.88 \text{ \AA}$ , H1 $\cdots$ O2( $-x,y,-z$ ) =  $1.86 \text{ \AA}$ , O1 $\cdots$ O2( $-x,y,-z$ ) =  $2.727(4) \text{ \AA}$ , O1–H1 $\cdots$ O2( $-x,y,-z$ ) =  $169^\circ$ ). Each two of these hydrogen bonds link two molecules cyclically into a pair (Fig. S2). The largest void in the structure, centered at  $x,y,z = 0.5, 0.255, 0.5$  according to program *MERCURY*, has only a void volume of  $18 \text{ \AA}^3$ , which is too small to accommodate any solvent molecule, in agreement with a maximum residual electron density of  $0.16 \text{ e/\AA}^3$ . Atomic coordinates, thermal parameters, and bond distances and angles were deposited in CIF format with the journal. These data can also be obtained free of charge from The Cambridge Crystallographic Data Centre via [www.ccdc.cam.ac.uk/data\\_request/cif](http://www.ccdc.cam.ac.uk/data_request/cif). CCDC number 1818362,

### References

1. G. M. Sheldrick, *Acta Cryst.*, 2015, **C71**, 3.
2. A. L. Spek, *Acta Cryst.*, 2009, **D65**, 148.
3. C. F. Macrae, P. R. Edgington, P. McCabe, E. Pidcock, G. P. Shields, R. Taylor, M. Towler and J. van de Streek, *J. Appl. Cryst.*, 2006, **39**, 453.

## ESI-29

Table S1. Crystal data and details of the structure determination for compound **23**.

| Crystal Data                                    |           |                |            |
|-------------------------------------------------|-----------|----------------|------------|
| Formula                                         |           | C30 H41 O4 P S |            |
| Formula Weight                                  |           | 528.66         |            |
| Crystal System                                  |           | monoclinic     |            |
| Space group                                     | C2        | (No. 5)        |            |
| a, b, c [Angstrom]                              | 21.157(6) | 6.917(2)       | 20.174(6)  |
| alpha, beta, gamma [deg]                        | 90        | 98.00(3)       | 90         |
| V [Ang <sup>3</sup> ]                           |           |                | 2923.6(15) |
| Z                                               |           |                | 4          |
| D(calc) [g/cm <sup>3</sup> ]                    |           |                | 1.201      |
| Mu(MoK $\alpha$ ) [mm <sup>-1</sup> ]           |           |                | 0.197      |
| F(000)                                          |           |                | 1136       |
| Crystal Size [mm]                               | 0.07 x    | 0.22 x         | 0.85       |
| Data Collection                                 |           |                |            |
| Temperature (K)                                 |           |                | 293        |
| Radiation [Angstrom]                            | MoKa      |                | 0.71073    |
| Theta Min-Max [Deg]                             |           | 2.5,           | 24.0       |
| Dataset h,k,l min.:max.                         | -24: 23 ; | 0: 7 ;         | 0: 23      |
| Total Data, Unique Data, R(int)                 | 2575,     | 2499,          | 0.028      |
| Observed data [I > 2.0 sigma(I)]                |           |                | 2202       |
| Refinement                                      |           |                |            |
| Nref, Npar                                      |           | 2496,          | 334        |
| R, wR2, S                                       | 0.0441,   | 0.1197,        | 1.07       |
| Max. and Av. Shift/Error                        |           | 0.00,          | 0.00       |
| Min. and Max. Resd. Dens. [e/Ang <sup>3</sup> ] |           | -0.23,         | 0.16       |

Table S2. Selected bond distances and angles (Å, deg.) for compound **23**.

|     |      |            |           |
|-----|------|------------|-----------|
| S1  | -C2  | 1.806 (5)  |           |
| S1  | -C3  | 1.775 (6)  |           |
| P1  | -O2  | 1.466 (3)  |           |
| P1  | -O3  | 1.564 (3)  |           |
| P1  | -O4  | 1.563 (4)  |           |
| P1  | -C1  | 1.840 (5)  |           |
| O1  | -C1  | 1.421 (5)  |           |
| O3  | -C10 | 1.443 (5)  |           |
| O4  | -C29 | 1.463 (8)  |           |
| O1  | -H1  | 0.880      |           |
| C1  | -C4  | 1.513 (6)  |           |
| C1  | -C2  | 1.530 (7)  |           |
| C4  | -C9  | 1.374 (8)  |           |
| C4  | -C5  | 1.387 (7)  |           |
| C5  | -C6  | 1.398 (8)  |           |
| C6  | -C7  | 1.359 (15) |           |
| C7  | -C8  | 1.362 (11) |           |
| C8  | -C9  | 1.383 (8)  |           |
| C10 | -C13 | 1.478 (8)  |           |
| C11 | -C20 | 1.396 (7)  |           |
| C11 | -C12 | 1.373 (7)  |           |
| C12 | -C13 | 1.380 (6)  |           |
| C13 | -C14 | 1.385 (8)  |           |
| C14 | -C15 | 1.366 (7)  |           |
| C15 | -C16 | 1.523 (7)  |           |
| C15 | -C20 | 1.395 (6)  |           |
| C16 | -C17 | 1.487 (8)  |           |
| C17 | -C18 | 1.509 (6)  |           |
| C18 | -C24 | 1.503 (7)  |           |
| C18 | -C19 | 1.539 (6)  |           |
| C19 | -C20 | 1.512 (6)  |           |
| C19 | -C21 | 1.524 (6)  |           |
| C21 | -C22 | 1.535 (8)  |           |
| C22 | -C23 | 1.514 (7)  |           |
| C23 | -C27 | 1.534 (9)  |           |
| C23 | -C28 | 1.531 (8)  |           |
| C23 | -C24 | 1.528 (6)  |           |
| C24 | -C25 | 1.529 (8)  |           |
| C25 | -C26 | 1.526 (9)  |           |
| C26 | -C27 | 1.526 (9)  |           |
| C29 | -C30 | 1.432 (11) |           |
| C2  | -S1  | -C3        | 104.2 (2) |
| O2  | -P1  | -O3        | 114.7 (2) |
| O2  | -P1  | -O4        | 114.0 (2) |
| O2  | -P1  | -C1        | 112.6 (2) |
| O3  | -P1  | -O4        | 103.3 (2) |
| O3  | -P1  | -C1        | 103.7 (2) |
| O4  | -P1  | -C1        | 107.6 (2) |
| P1  | -O3  | -C10       | 122.7 (3) |
| P1  | -O4  | -C29       | 123.3 (4) |
| C1  | -O1  | -H1        | 108.0     |
| P1  | -C1  | -O1        | 103.2 (3) |
| P1  | -C1  | -C2        | 109.6 (3) |
| O1  | -C1  | -C2        | 110.9 (3) |
| O1  | -C1  | -C4        | 108.5 (4) |
| P1  | -C1  | -C4        | 110.6 (3) |
| S1  | -C2  | -C1        | 116.0 (3) |

Fig. S1. The molecular structure of **23** in solid state showing displacement ellipsoids at 20% probability.

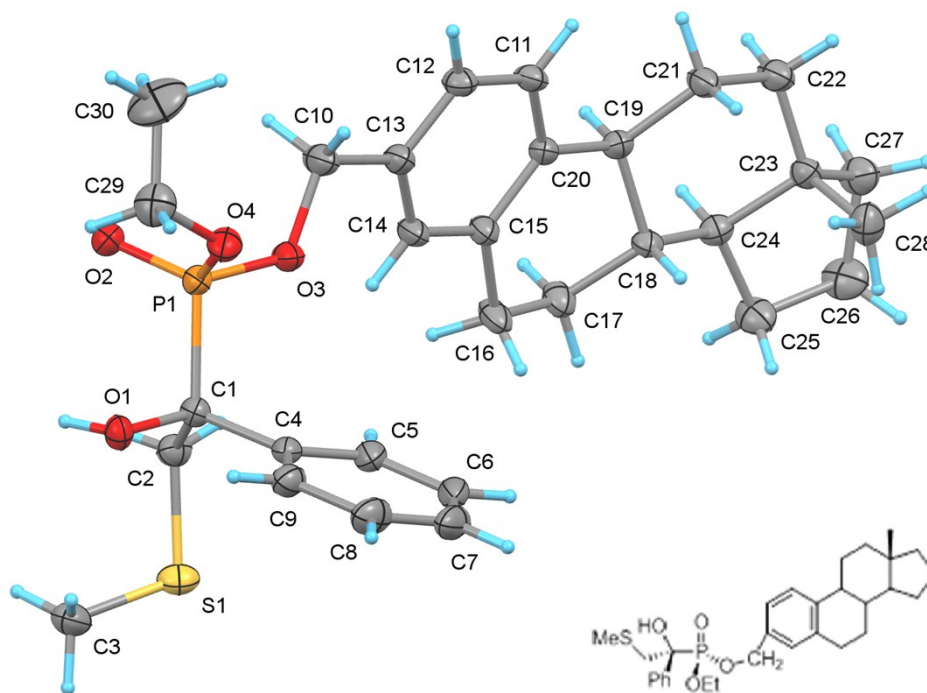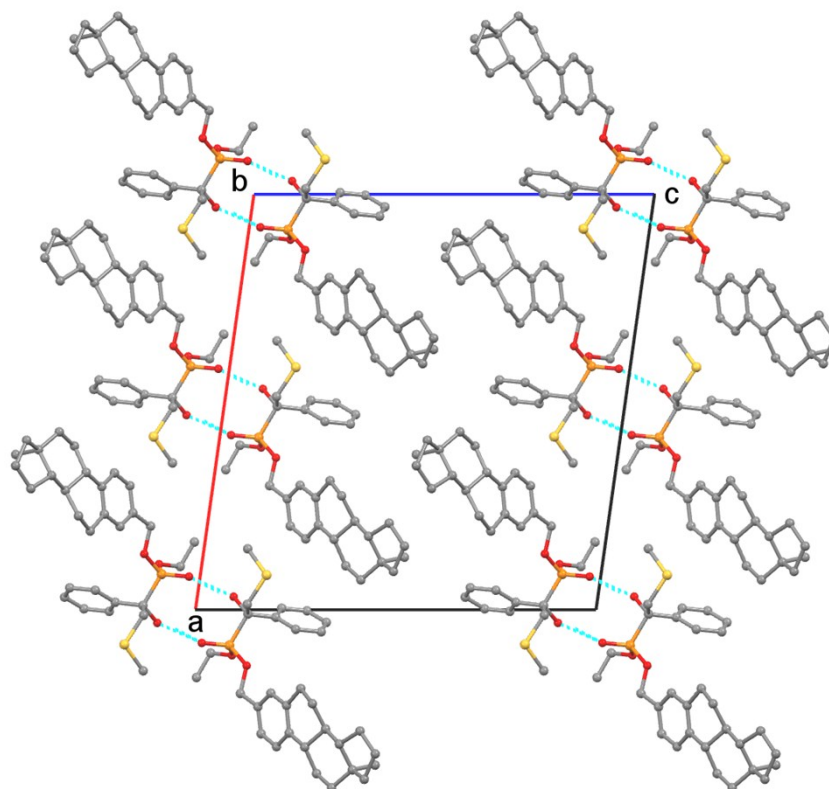

Supplement: c8ob00419f1.pdf [file c8ob00419f1.pdf]
